# Supplementary material for: Development of Semisynthetic Apoptosis-Inducing Agents Based on Natural Phenolic Acids Scaffold: Design, Synthesis and In-Vitro Biological Evaluation
Source: MDPI journal article supplement (doi:10.3390/molecules27196724), 2022-10-09

**Researcher** : DR Moh.Abdelbasir email: [m\\_a\\_baser@yahoo.com](mailto:m_a_baser@yahoo.com) *mob.01*  
**Assay** : Cell Cycle Analysis  
**Samples** : 12 Samples  
**Cell lines** : **Caco2**  
**Ref.** : ---  
**Date** : 25-06-2019  
**Reader** : **BD FACSCalibur**  
**Kit used** : ab139418\_Propidium Iodide Flow Cytometry Kit/BD  
**Solvent** : ---  
**Assay samples** :Cell culture

### Key for sample codes

| Cpd. No.    | Cpd. No. | Cpd. No.    | Cpd. No. |
|-------------|----------|-------------|----------|
| <b>CA1</b>  | 3        | <b>FA1</b>  | 12       |
| <b>CA2</b>  | 4        | <b>FA2</b>  | 13       |
| <b>CA3</b>  | 5        | <b>FA3</b>  | 14       |
| <b>CA5</b>  | 6        | <b>FA5</b>  | 15       |
| <b>CA6</b>  | 7        | <b>FA7</b>  | 16       |
| <b>CA7</b>  | 8        | <b>FA8</b>  | 17       |
| <b>CA9</b>  | 9        | <b>FA9</b>  | 18       |
| <b>CA11</b> | 10       | <b>FA11</b> | 19       |
| <b>CA12</b> | 11       | <b>FA12</b> | 20       |

# Report

| Sample data |            |               | Results        |                |                |                |                                         |
|-------------|------------|---------------|----------------|----------------|----------------|----------------|-----------------------------------------|
| ser         | code       | Used conc. uM | %G0-G1         | %S             | %G2-M          | %Pre G1        | Comment                                 |
| 1           | s1/Caco2   |               | 46.29<br>±3.1  | 33.22<br>±1.99 | 20.49±<br>1.92 | 11.31<br>±0.81 | PreG1 apoptosis&Cell growth arrest@G2/M |
| 2           | s2/Caco2   |               | 39.77<br>±2.29 | 34.08<br>±2.63 | 26.15±<br>3.26 | 13.22<br>±0.63 |                                         |
| 3           | CA3/Caco2  |               | 41.52<br>±2.61 | 31.62<br>±1.79 | 26.86±<br>2.75 | 7.56<br>±0.39  |                                         |
| 4           | CA6/Caco2  |               | 28.68<br>±1.64 | 26.41<br>±2.15 | 44.91±<br>3.42 | 18.26<br>±1.42 |                                         |
| 5           | CA9/Caco2  |               | 38.51<br>±1.95 | 31.44<br>±2.87 | 30.05±<br>2.59 | 9.62<br>±0.37  |                                         |
| 6           | CA11/Caco2 |               | 29.75<br>1.73± | 28.27<br>±1.99 | 41.98±<br>2.18 | 23.42<br>±2.12 |                                         |
| 7           | CA12/Caco2 |               | 41.09<br>±2.76 | 33.36<br>±2.73 | 25.55±<br>2.47 | 14.04<br>±0.95 |                                         |
| 8           | FA3/Caco2  |               | 34.28<br>±1.74 | 31.15<br>±3.17 | 34.57±<br>4.16 | 16.51<br>±0.63 |                                         |
| 9           | FA5/Caco2  |               | 26.59<br>±2.67 | 22.58<br>±2.91 | 50.83±<br>3.49 | 25.17<br>±3.29 |                                         |
| 10          | FA8/Caco2  |               | 42.11<br>±3.41 | 29.43<br>±3.16 | 28.46±<br>2.64 | 12.11<br>±0.97 |                                         |
| 11          | FA9/Caco2  |               | 33.26<br>±4.29 | 29.12<br>±4.05 | 37.62±<br>2.47 | 12.92<br>±2.16 |                                         |
| 12          | FA12/Caco2 |               | 39.12<br>±2.58 | 34.04<br>±2.69 | 26.84±<br>2.34 | 8.62<br>±0.69  |                                         |
| ***         | cont.Caco2 |               | 53.61<br>±3.16 | 37.95<br>±2.25 | 8.44±<br>0.63  | 1.78<br>±0.08  |                                         |

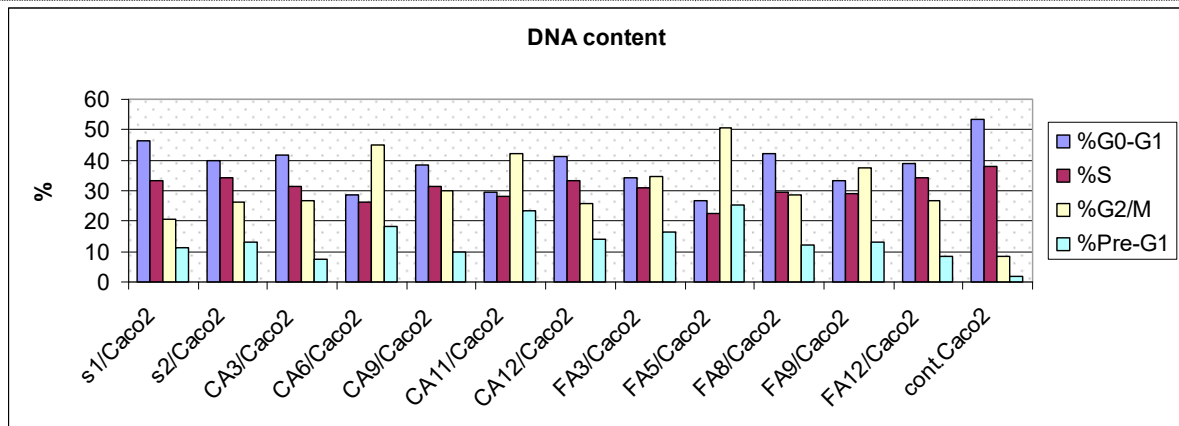

## Detailed results

| s   |             | Apoptosis |       |       | Necrosis |
|-----|-------------|-----------|-------|-------|----------|
|     |             | Total     | Early | Late  |          |
| 1   | s1/Caco2    | 11.31     | 3.41  | 5.98  | 1.92     |
| 2   | s2/Caco2    | 13.22     | 5.17  | 6.48  | 1.57     |
| 3   | CA3/Caco2   | 7.56      | 2.59  | 3.93  | 1.04     |
| 4   | CA6/Caco2   | 18.26     | 4.75  | 11.37 | 2.14     |
| 5   | CA9/Caco2   | 9.62      | 3.72  | 4.54  | 1.36     |
| 6   | CA11/Caco2  | 23.42     | 7.59  | 12.69 | 3.14     |
| 7   | CA12/Caco2  | 14.04     | 2.47  | 9.5   | 2.07     |
| 8   | FA3/Caco2   | 16.51     | 3.99  | 10.26 | 2.26     |
| 9   | FA5/Caco2   | 25.17     | 5.79  | 16.57 | 2.81     |
| 10  | FA8/Caco2   | 12.11     | 4.25  | 6.25  | 1.61     |
| 11  | FA9/Caco2   | 12.92     | 3.88  | 7.31  | 1.73     |
| 12  | FA12/Caco2  | 8.62      | 2.19  | 5.19  | 1.24     |
| *** | cont .Caco2 | 1.78      | 0.89  | 0.25  | 0.64     |

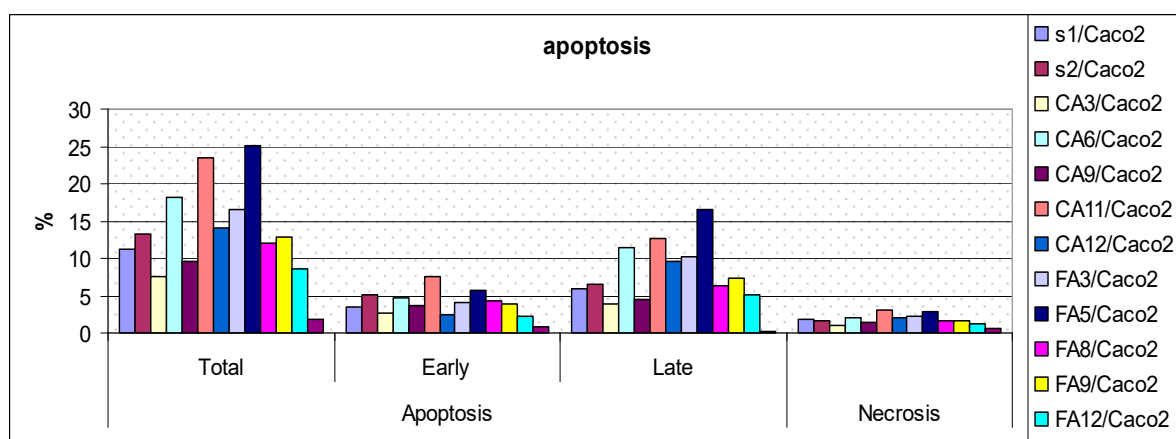

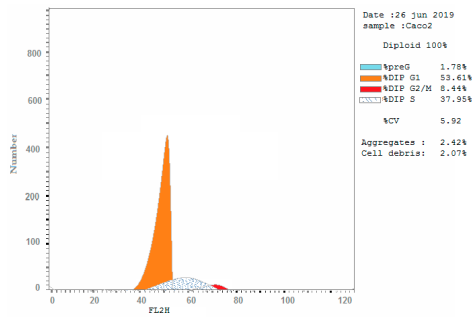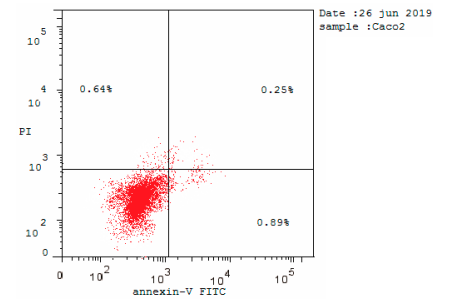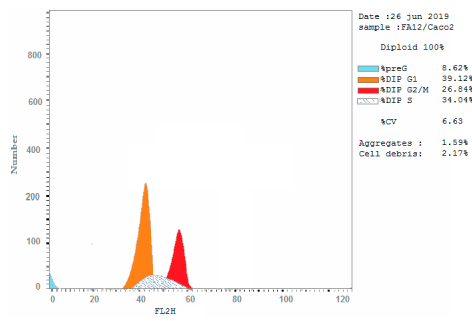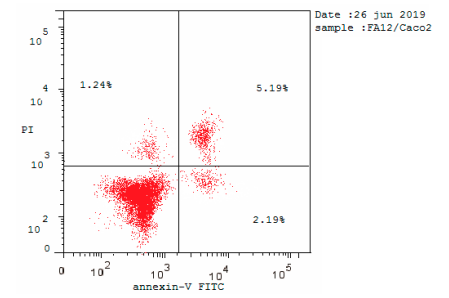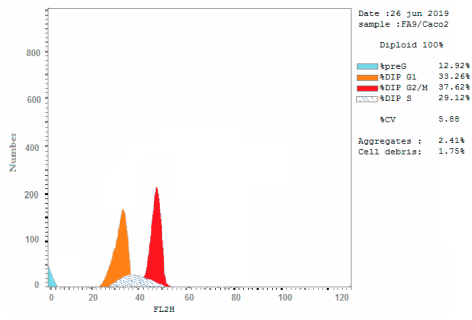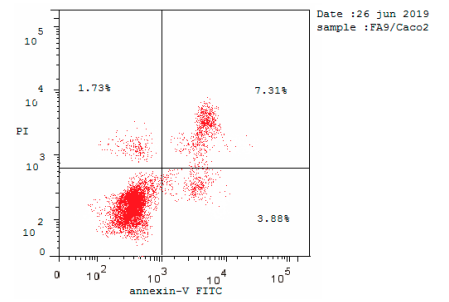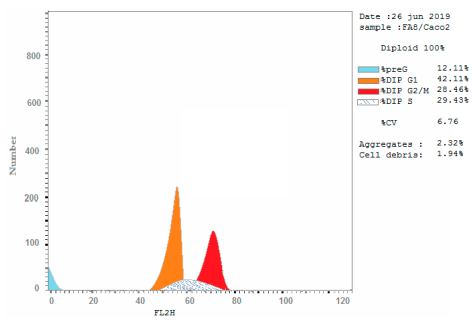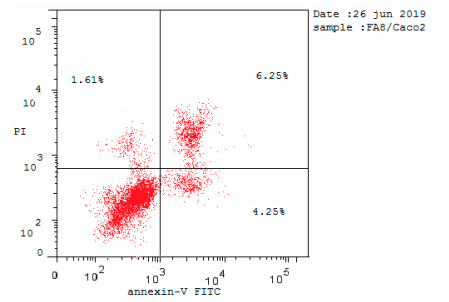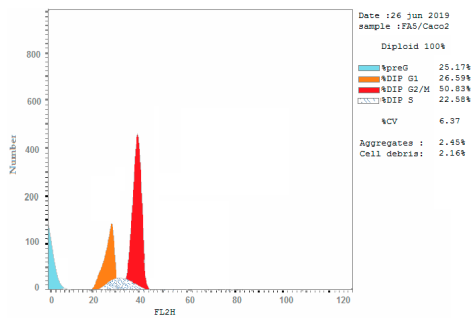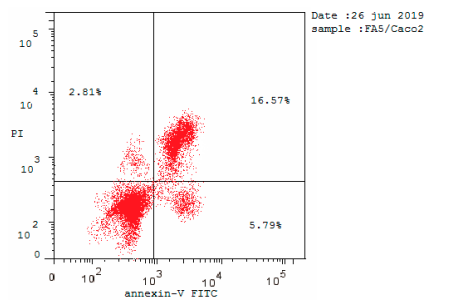

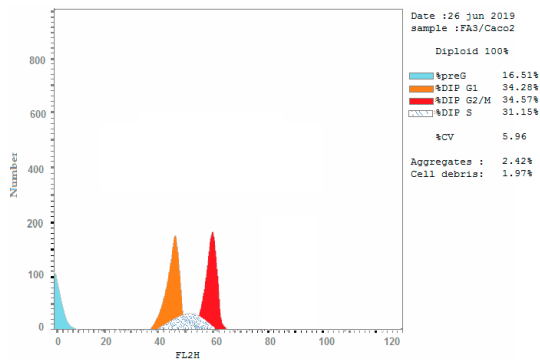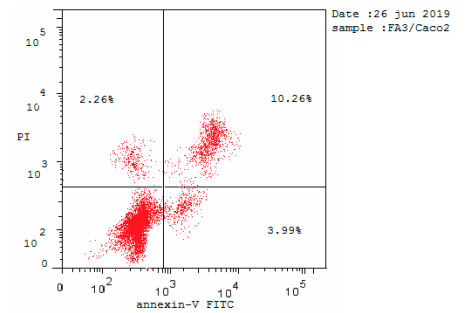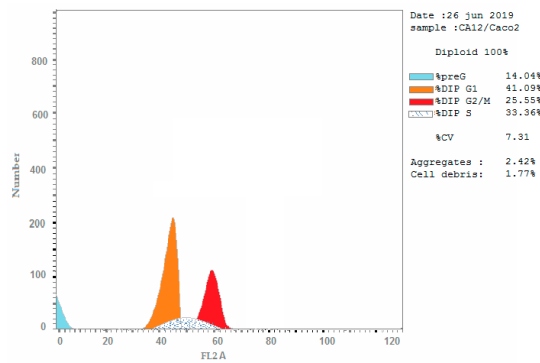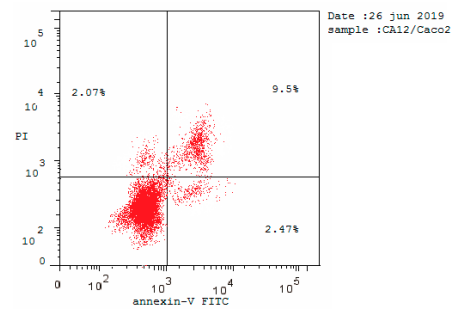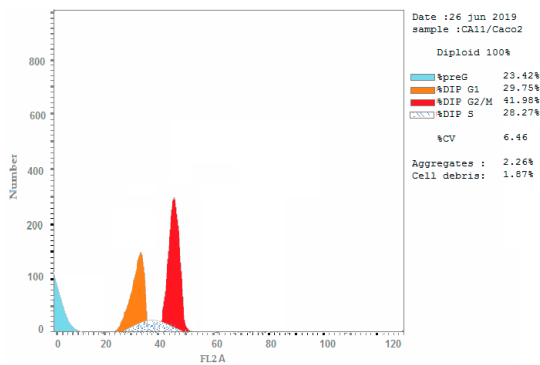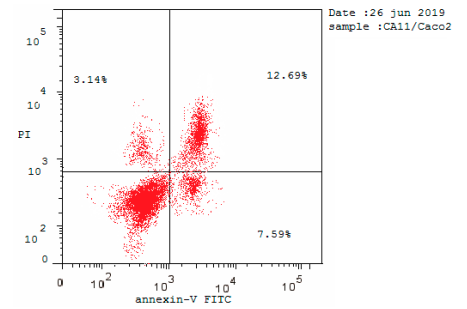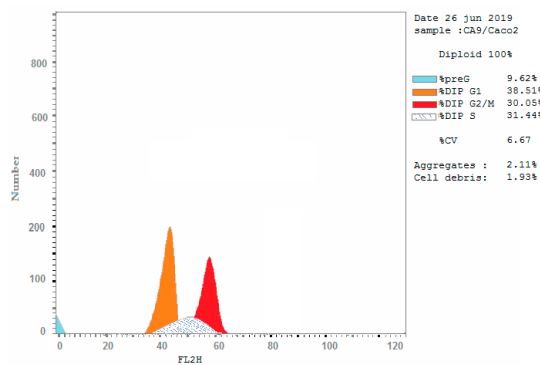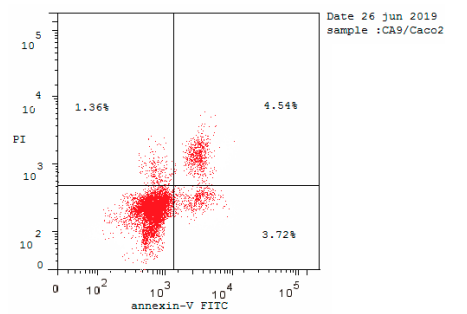

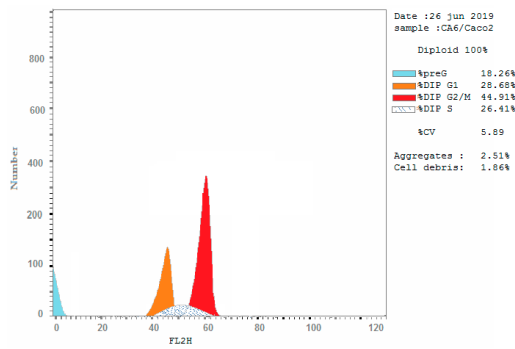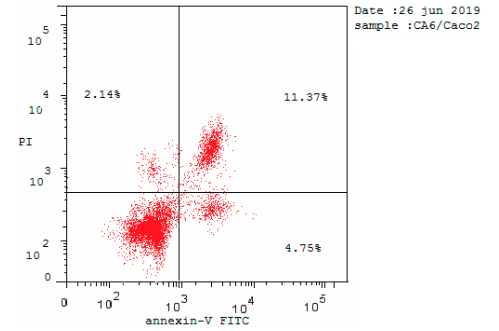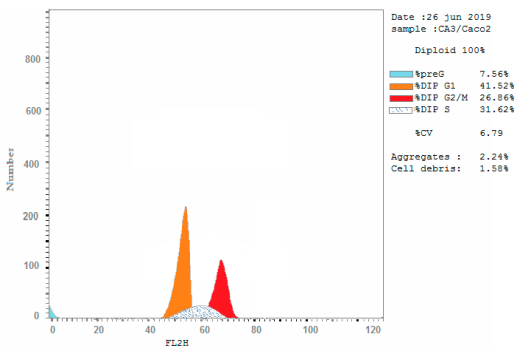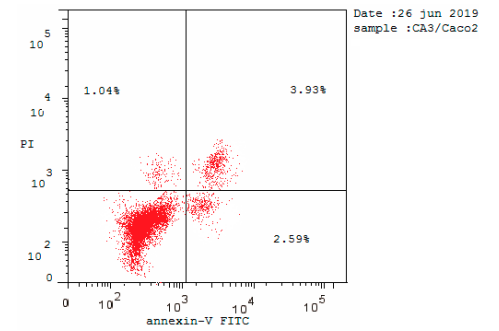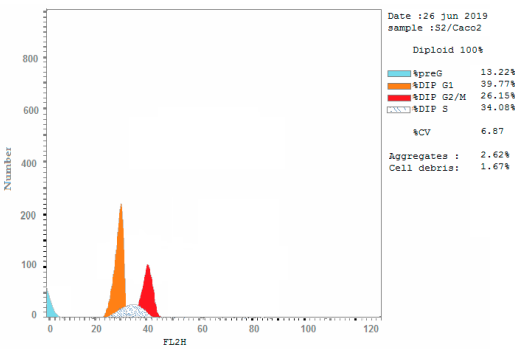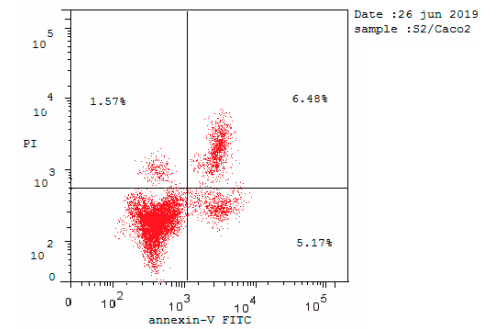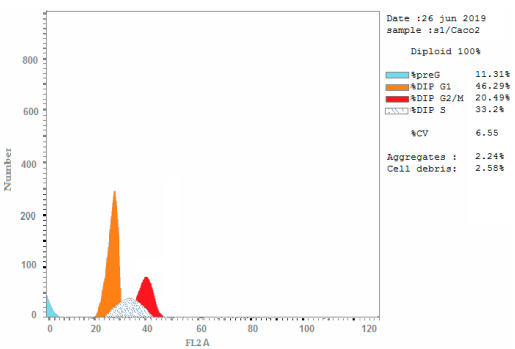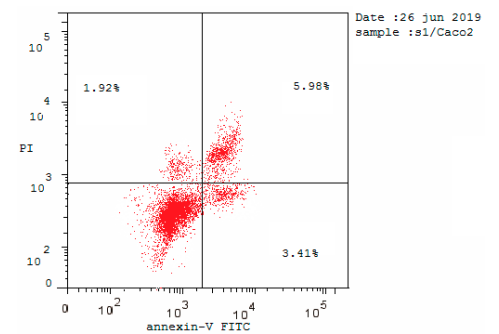

Supplement: s1 [file s1]
