# Supplementary material for: Development of Semisynthetic Apoptosis-Inducing Agents Based on Natural Phenolic Acids Scaffold: Design, Synthesis and In-Vitro Biological Evaluation
Source: MDPI journal article supplement (doi:10.3390/molecules27196724), 2022-10-09

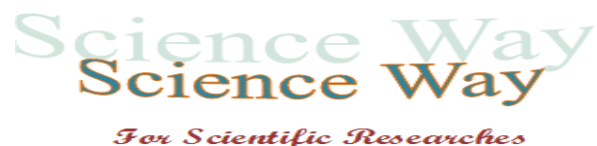

## Viability assay

**Test code: T-4-019-5**

**Institute / Researcher: prof.Dr. nora abo rehab**

**Experiment :** functional assay (MTT)  
(viability/cytotoxicity)

**samples number: 2**

**experiment design: viability against HepG2, Panc 1, Caco2, A549, Mcf7 and  
vero cells**

**laboratory comments:**

## **Viability assay**

### **MTT protocol**

#### **Determination of sample cytotoxicity on cells (MTT protocol)**

1-the 96 well tissue culture plate was inoculated with  $1 \times 10^5$  cells / ml (100 ul / well) and incubated at 37°C for 24 hours to develop a complete monolayer sheet.

2- Growth medium was decanted from 96 well micro titer plates after confluent sheet of cells were formed, cell monolayer was washed twice with wash media.

3- two-fold dilutions of tested sample was made in RPMI medium with 2% serum (maintenance medium).

4- 0.1 ml of each dilution was tested in different wells leaving 3 wells as control, receiving only maintenance medium.

5- Plate was incubated at 37°C and examined. Cells were checked for any physical signs of toxicity, e.g. partial or complete loss of the monolayer, rounding, shrinkage, or cell granulation.

6- MTT solution was prepared (5mg/ml in PBS) (BIO BASIC CANADA INC).

8- 20ul MTT solution were added to each well. Place on a shaking table, 150rpm for 5 minutes, to thoroughly mix the MTT into the media.

9) Incubate (37C, 5% CO<sub>2</sub>) for 1-5 hours to allow the MTT to be metabolized.

10) Dump off the media. (dry plate on paper towels to remove residue if necessary).

11) Resuspend formazan (MTT metabolic product) in 200ul DMSO. Place on a shaking table, 150rpm for 5 minutes, to thoroughly mix the formazan into the solvent.

12) Read optical density at 560nm and subtract background at 620nm. Optical density should be directly correlated with cell quantity.

| ID   | Conc.<br>ug/ml | O.D   |       |       | Mean<br>O.D | ST.E     | Viability % | Toxicity %  | IC50    |
|------|----------------|-------|-------|-------|-------------|----------|-------------|-------------|---------|
| A549 | dilution       | 0.256 | 0.284 | 0.267 | 0.269       | 0.008145 | 100         | 0           | ug      |
| 1    | 500            | 0.063 | 0.052 | 0.058 | 0.057667    | 0.00318  | 21.43742255 | 78.56257745 | 316.639 |
|      | 250            | 0.13  | 0.119 | 0.131 | 0.126667    | 0.003844 | 47.08798017 | 52.91201983 |         |
|      | 125            | 0.262 | 0.251 | 0.263 | 0.258667    | 0.003844 | 96.15861214 | 3.841387856 |         |
|      | 62.5           | 0.264 | 0.27  | 0.265 | 0.266333    | 0.001856 | 99.0086741  | 0.991325898 |         |
|      | 31.25          | 0.272 | 0.269 | 0.265 | 0.268667    | 0.002028 | 99.87608426 | 0.123915737 |         |
|      | 15.625         | 0.263 | 0.274 | 0.264 | 0.267       | 0.003512 | 99.25650558 | 0.743494424 |         |
| 2    | 500            | 0.054 | 0.066 | 0.074 | 0.064667    | 0.005812 | 24.03965304 | 75.96034696 | 314.441 |
|      | 250            | 0.113 | 0.099 | 0.118 | 0.11        | 0.005686 | 40.89219331 | 59.10780669 |         |
|      | 125            | 0.254 | 0.253 | 0.267 | 0.258       | 0.004509 | 95.91078067 | 4.089219331 |         |
|      | 62.5           | 0.268 | 0.27  | 0.263 | 0.267       | 0.002082 | 99.25650558 | 0.743494424 |         |
|      | 31.25          | 0.275 | 0.264 | 0.259 | 0.266       | 0.004726 | 98.88475836 | 1.115241636 |         |
|      | 15.625         | 0.267 | 0.267 | 0.266 | 0.266667    | 0.000333 | 99.13258984 | 0.867410161 |         |

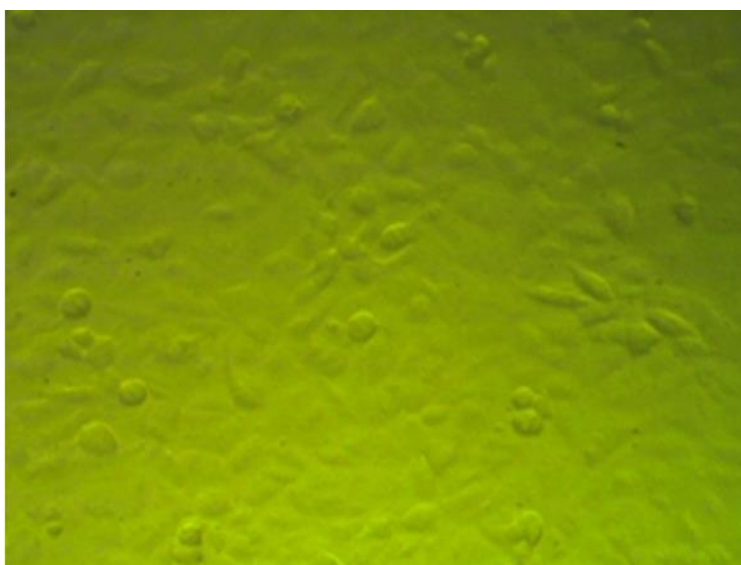

**control**  
**A549 cells**

Organism: *Homo sapiens*, human  
Tissue : lung  
Cell Type : epithelial  
Culture Properties : adherent  
Disease : Carcinoma

## Effect of comp. 1 on A549 cells at different concentration

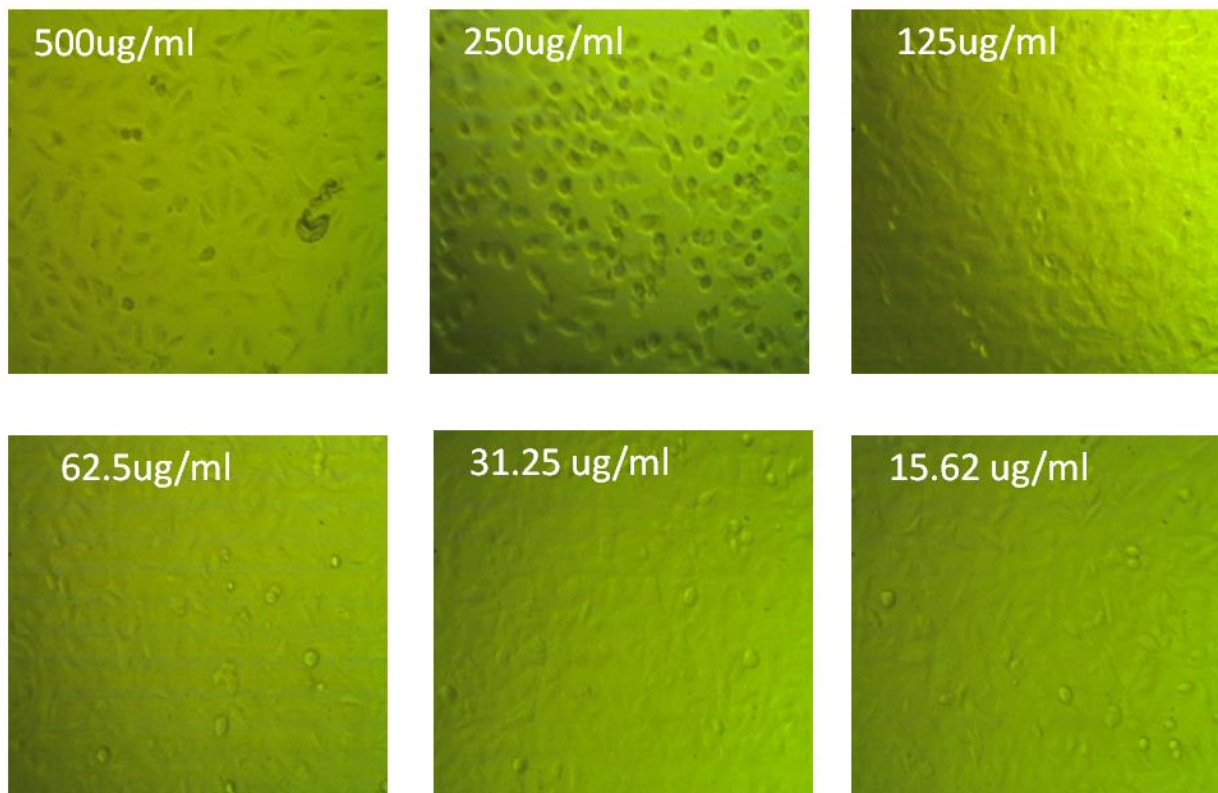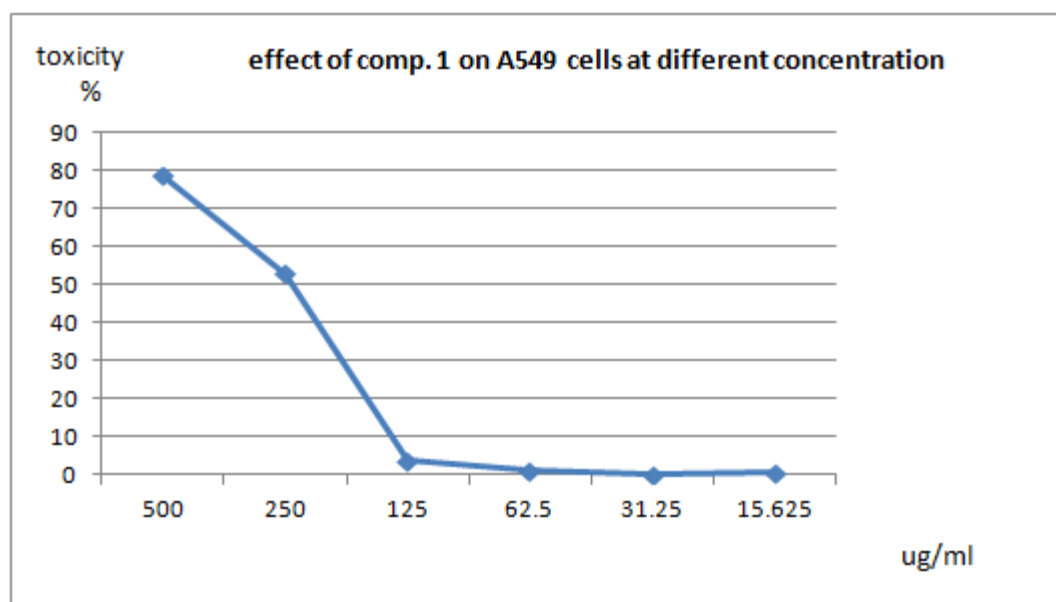

## Effect of comp. 2 on A549 cells at different concentration

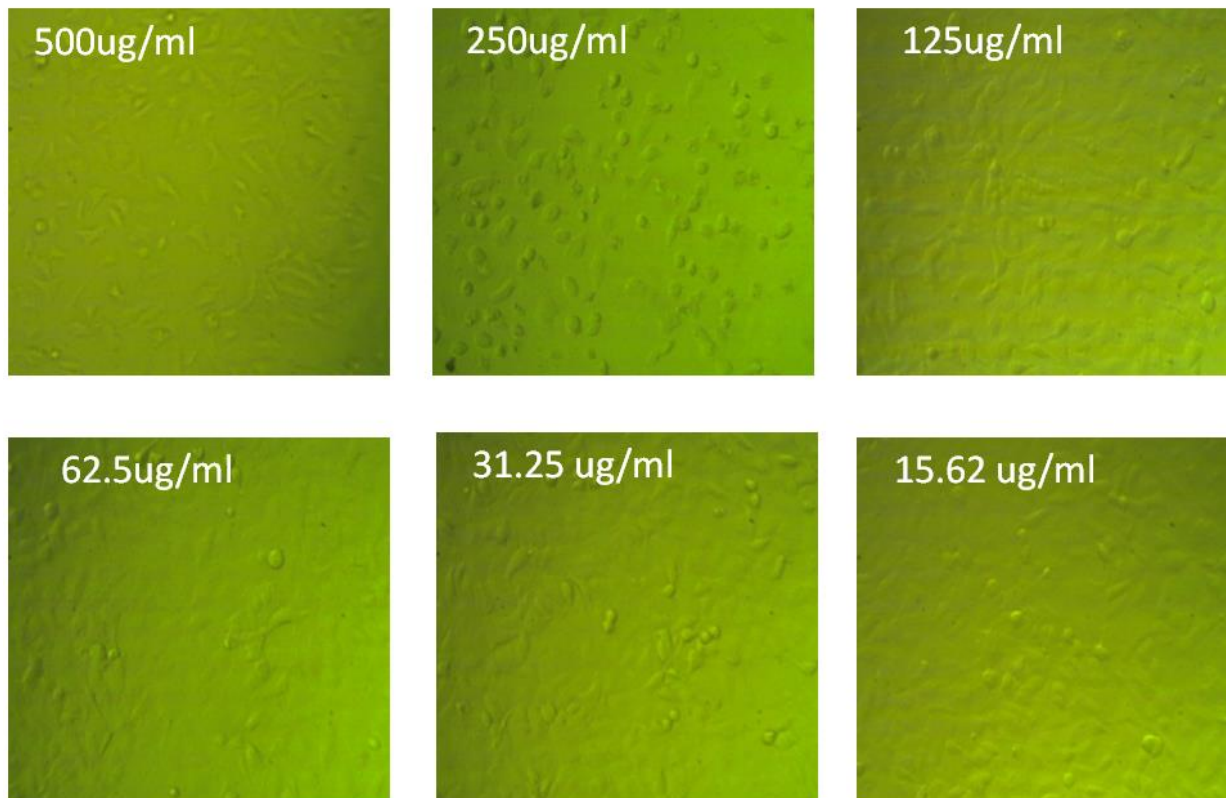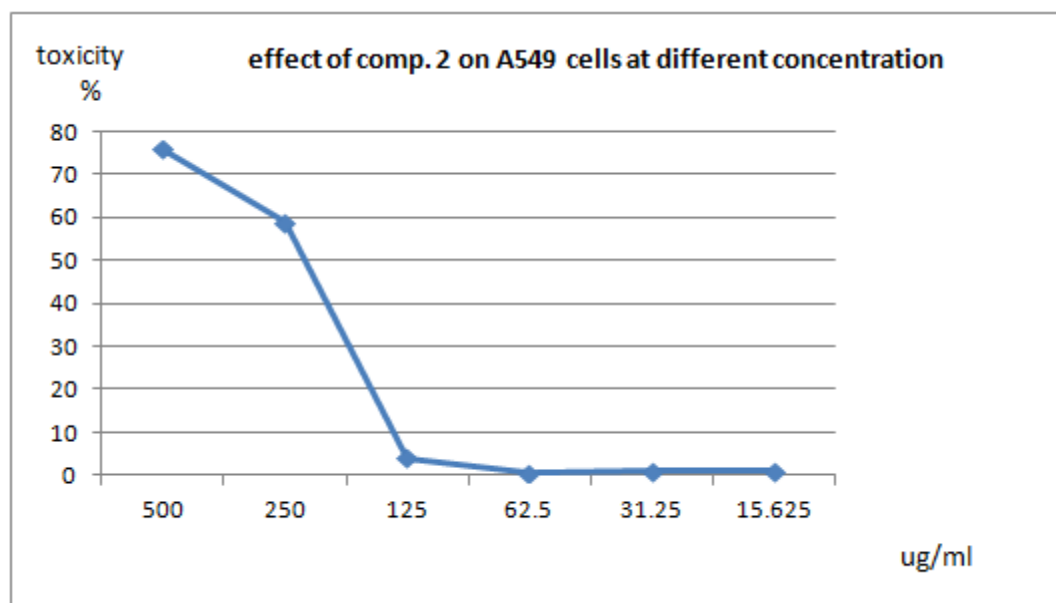

| ID    | Conc.<br>ug/ml | O.D   |       |       | Mean<br>O.D | ST.E     | Viability % | Toxicity %  | IC50   |
|-------|----------------|-------|-------|-------|-------------|----------|-------------|-------------|--------|
| Caco2 | dilution       | 0.336 | 0.348 | 0.357 | 0.347       | 0.006083 | 100         | 0           | ug     |
| 1     | 500            | 0.041 | 0.036 | 0.047 | 0.041333    | 0.00318  | 11.91162344 | 88.08837656 | 81.173 |
|       | 250            | 0.074 | 0.066 | 0.069 | 0.069667    | 0.002333 | 20.07684918 | 79.92315082 |        |
|       | 125            | 0.089 | 0.092 | 0.087 | 0.089333    | 0.001453 | 25.74447646 | 74.25552354 |        |
|       | 62.5           | 0.154 | 0.169 | 0.168 | 0.163667    | 0.004842 | 47.16618636 | 52.83381364 |        |
|       | 31.25          | 0.302 | 0.314 | 0.316 | 0.310667    | 0.004372 | 89.52929875 | 10.47070125 |        |
|       | 15.625         | 0.347 | 0.35  | 0.343 | 0.346667    | 0.002028 | 99.90393852 | 0.096061479 |        |
| 2     | 500            | 0.045 | 0.063 | 0.055 | 0.054333    | 0.005207 | 15.65802113 | 84.34197887 | 96.402 |
|       | 250            | 0.042 | 0.037 | 0.044 | 0.041       | 0.002082 | 11.81556196 | 88.18443804 |        |
|       | 125            | 0.097 | 0.108 | 0.101 | 0.102       | 0.003215 | 29.39481268 | 70.60518732 |        |
|       | 62.5           | 0.274 | 0.263 | 0.269 | 0.268667    | 0.00318  | 77.42555235 | 22.57444765 |        |
|       | 31.25          | 0.314 | 0.312 | 0.317 | 0.314333    | 0.001453 | 90.58597502 | 9.414024976 |        |
|       | 15.625         | 0.341 | 0.351 | 0.346 | 0.346       | 0.002887 | 99.71181556 | 0.288184438 |        |

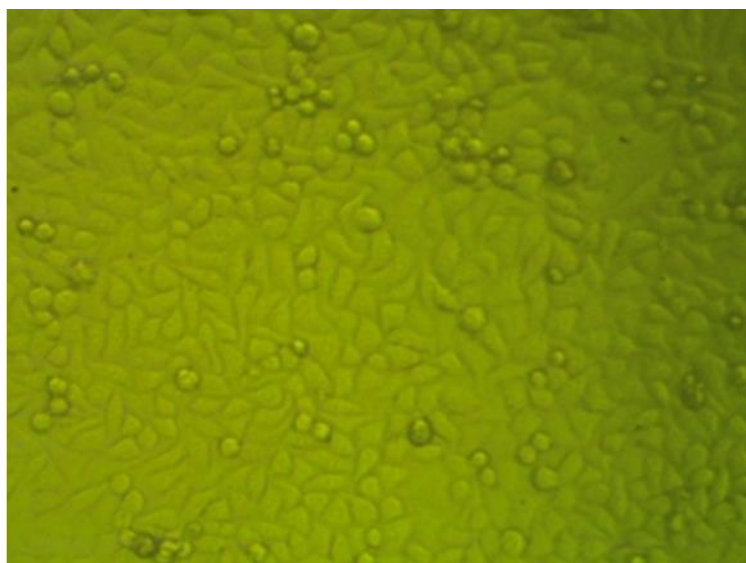

**control  
Caco2 cells**

Organism : *Homo sapiens*, human  
Tissue : Colon  
Cell Type : epithelial  
Culture Properties : adherent  
Disease : Colorectal adenocarcinoma  
ATCC : ATB-37



## Effect of comp. 1 on Caco2 cells at different concentration

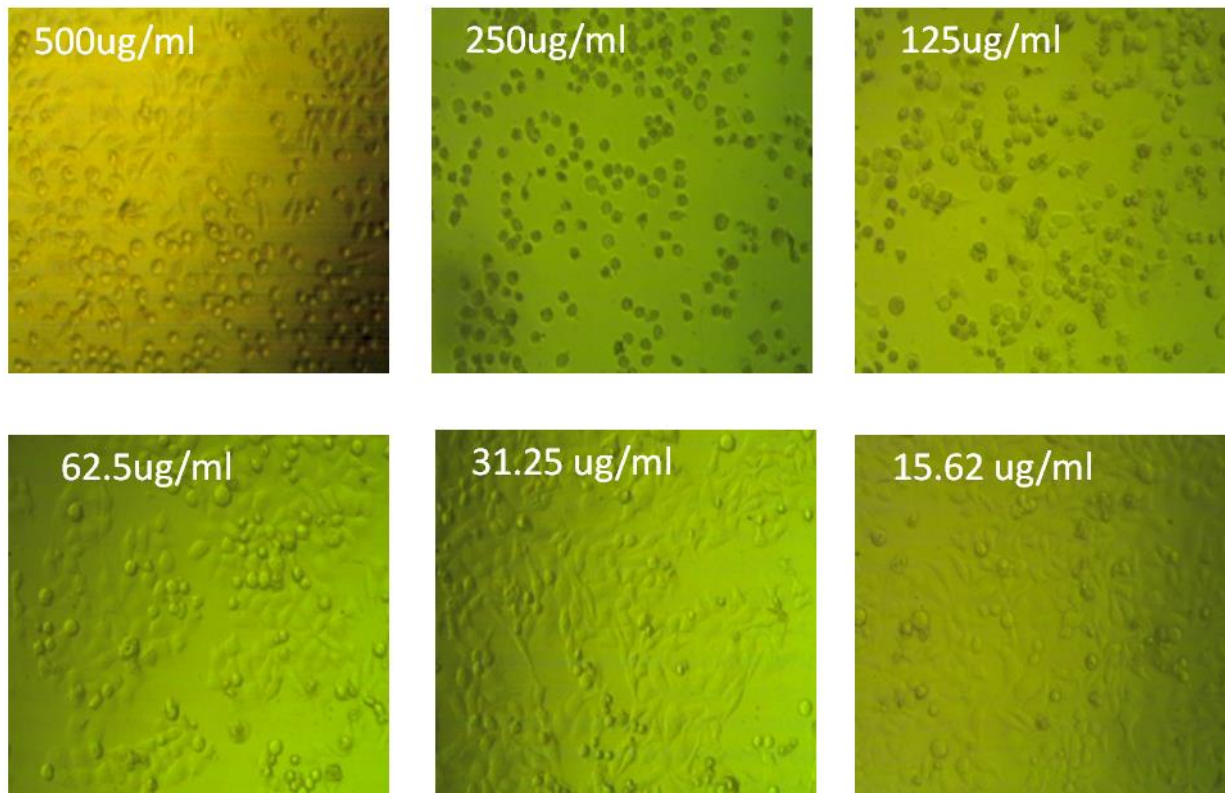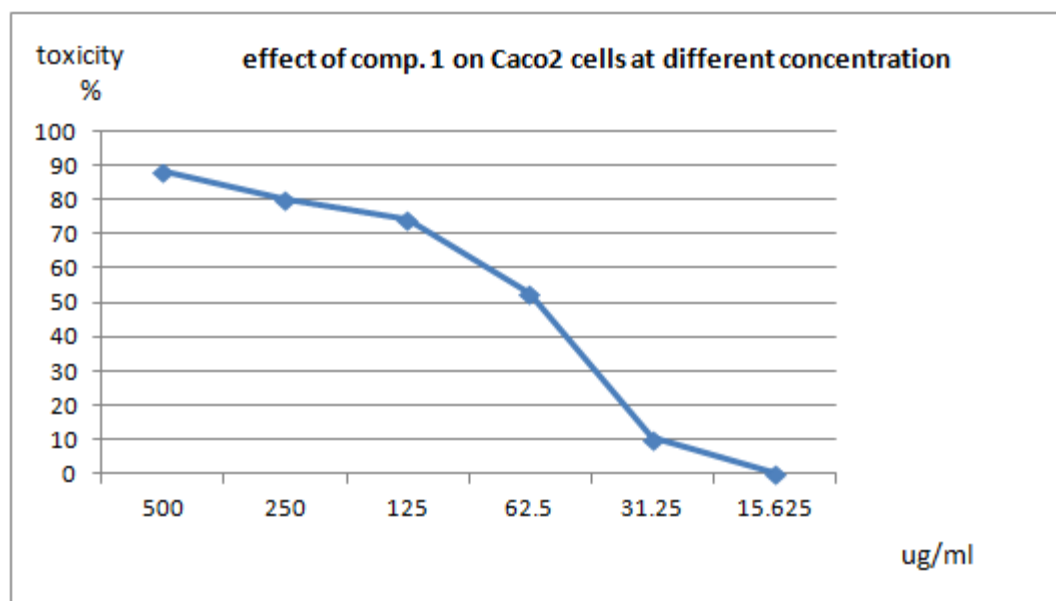



## Effect of comp. 2 on Caco2 cells at different concentration

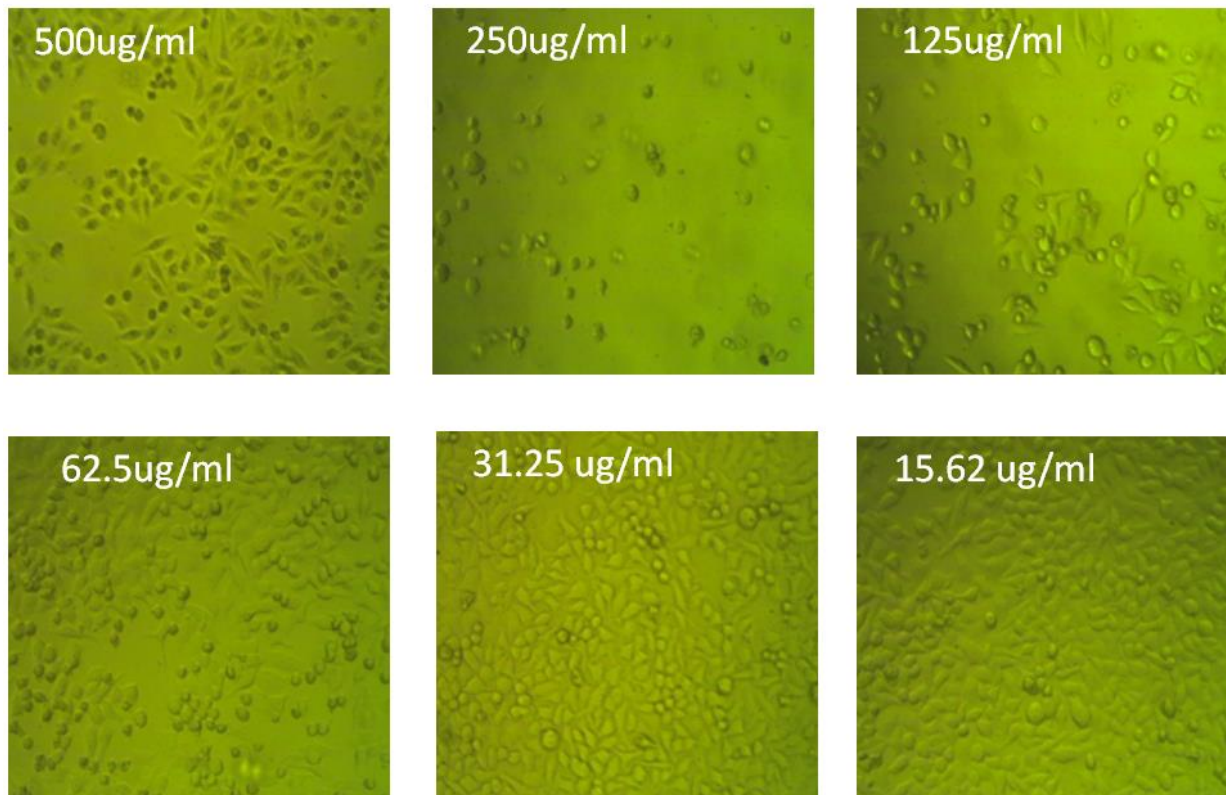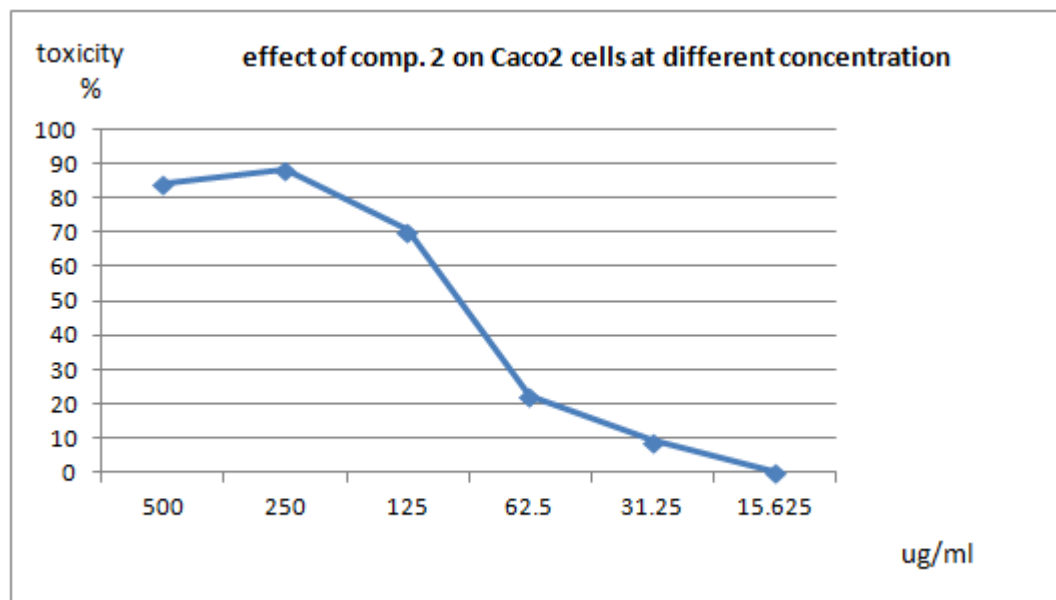

| ID    | Conc.<br>ug/ml | O.D   |       |       | Mean<br>O.D | ST.E     | Viability % | Toxicity %  | IC50    |
|-------|----------------|-------|-------|-------|-------------|----------|-------------|-------------|---------|
| HepG2 | dilution       | 0.323 | 0.341 | 0.326 | 0.33        | 0.005568 | 100         | 0           | ug      |
| 1     | 500            | 0.06  | 0.057 | 0.042 | 0.053       | 0.005568 | 16.06060606 | 83.93939394 | 201.181 |
|       | 250            | 0.097 | 0.083 | 0.096 | 0.092       | 0.004509 | 27.87878788 | 72.12121212 |         |
|       | 125            | 0.284 | 0.277 | 0.294 | 0.285       | 0.004933 | 86.36363636 | 13.63636364 |         |
|       | 62.5           | 0.324 | 0.331 | 0.33  | 0.328333    | 0.002186 | 99.49494949 | 0.505050505 |         |
|       | 31.25          | 0.329 | 0.326 | 0.334 | 0.329667    | 0.002333 | 99.8989899  | 0.101010101 |         |
|       | 15.625         | 0.326 | 0.331 | 0.331 | 0.329333    | 0.001667 | 99.7979798  | 0.202020202 |         |

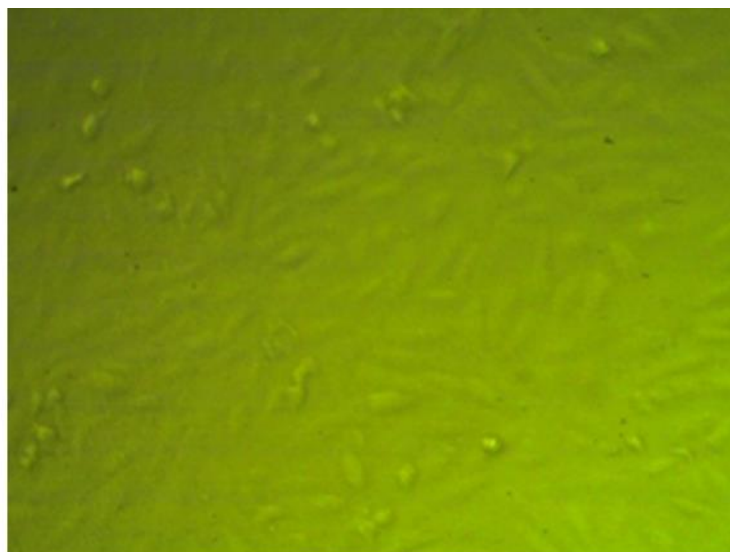

**control**  
**HepG2 cells**

Organism : *Homo sapiens*, human  
Tissue : liver  
Cell Type : epithelial  
Culture Properties : adherent  
Disease : hepatocellular carcinoma

## Effect of comp. 1 on HepG2 cells at different concentration

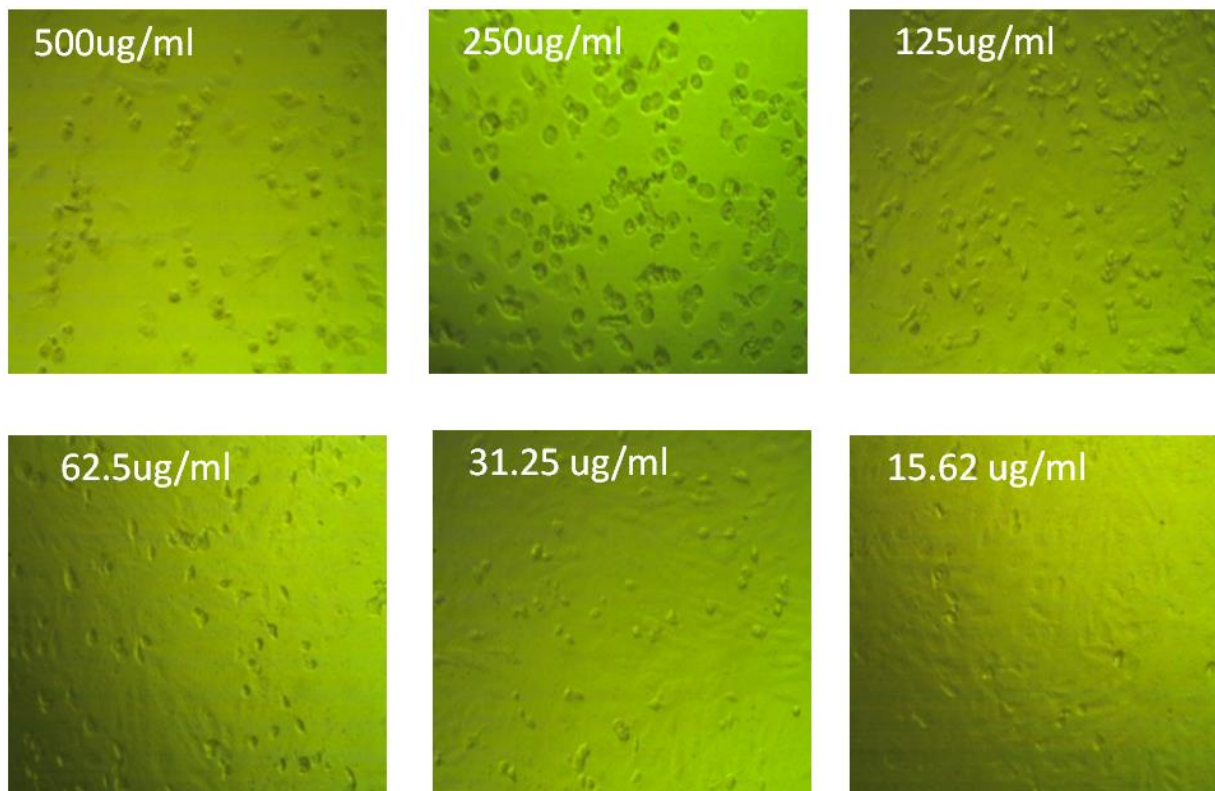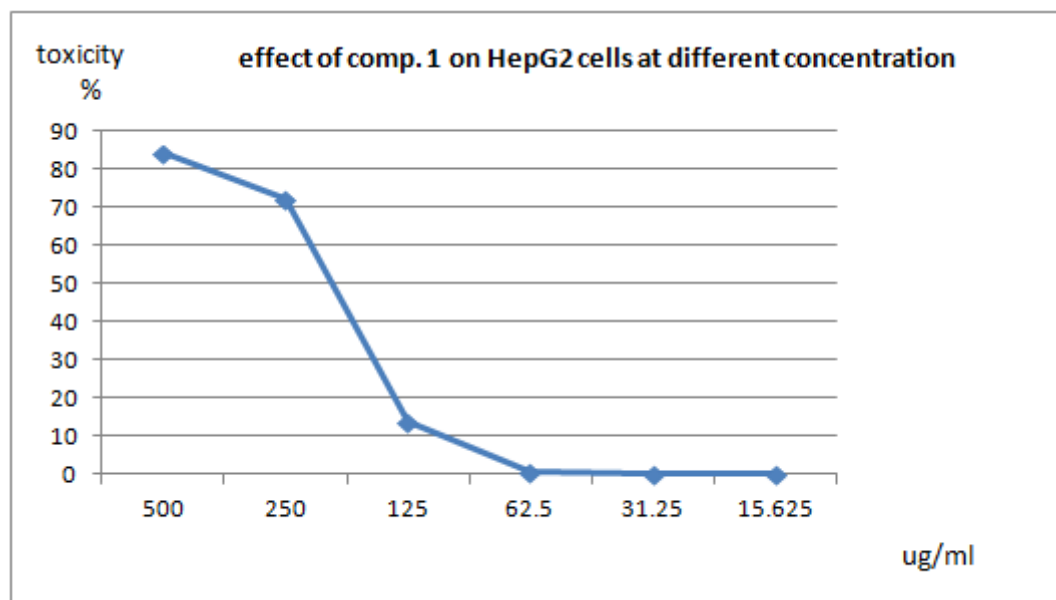

| ID   | Conc.<br>ug/ml | O.D   |       |       | Mean<br>O.D | ST.E     | Viability % | Toxicity %  | IC50    |
|------|----------------|-------|-------|-------|-------------|----------|-------------|-------------|---------|
| Mcf7 | dilution       | 0.299 | 0.316 | 0.318 | 0.311       | 0.006028 | 100         | 0           | ug      |
| 2    | 500            | 0.036 | 0.04  | 0.033 | 0.036333    | 0.002028 | 11.68274384 | 88.31725616 | 202.921 |
|      | 250            | 0.097 | 0.094 | 0.083 | 0.091333    | 0.004256 | 29.3676313  | 70.6323687  |         |
|      | 125            | 0.277 | 0.248 | 0.267 | 0.264       | 0.008505 | 84.88745981 | 15.11254019 |         |
|      | 62.5           | 0.31  | 0.305 | 0.311 | 0.308667    | 0.001856 | 99.24973205 | 0.750267953 |         |
|      | 31.25          | 0.306 | 0.314 | 0.307 | 0.309       | 0.002517 | 99.35691318 | 0.643086817 |         |
|      | 15.625         | 0.316 | 0.299 | 0.306 | 0.307       | 0.004933 | 98.71382637 | 1.286173633 |         |

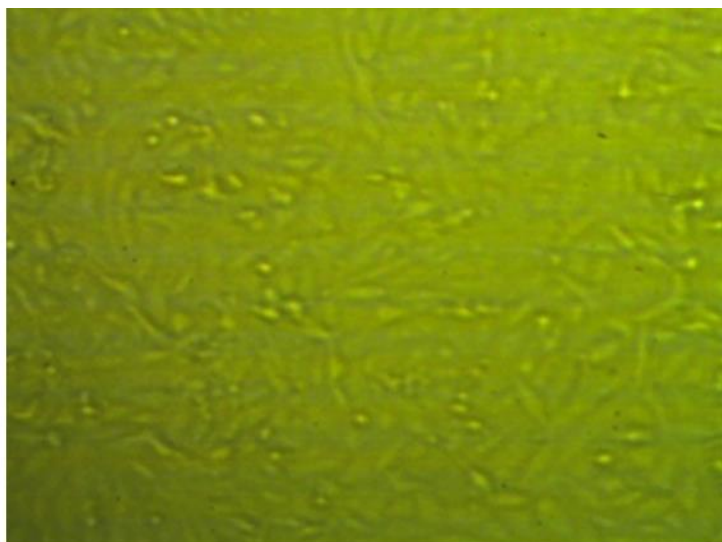

**control**  
**Mcf7 cells**

Organism : *Homo sapiens*, human  
Tissue : mammary gland, breast; derived from metastatic site: pleural effusion  
Cell Type : epithelial  
Culture Properties : adherent  
Disease : adenocarcinoma  
ATCC : HTB-22



## Effect of comp. 2 on Mcf7 cells at different concentration

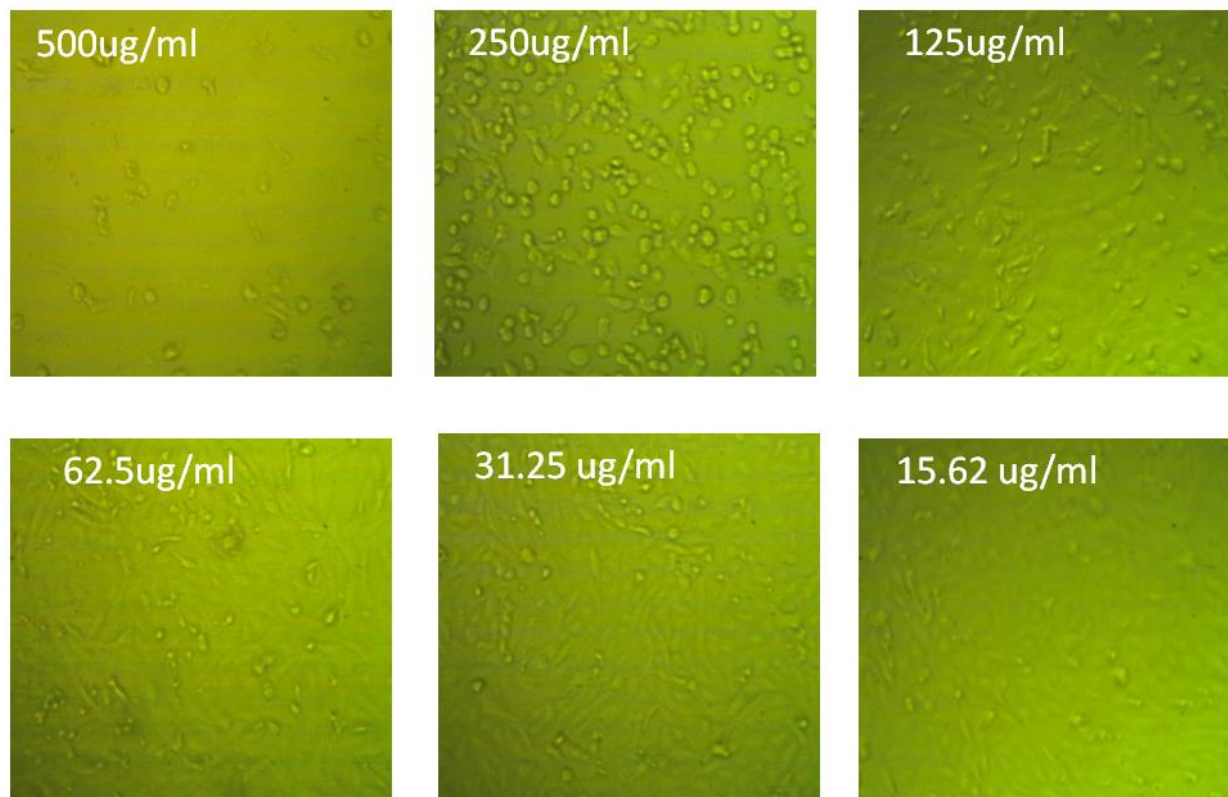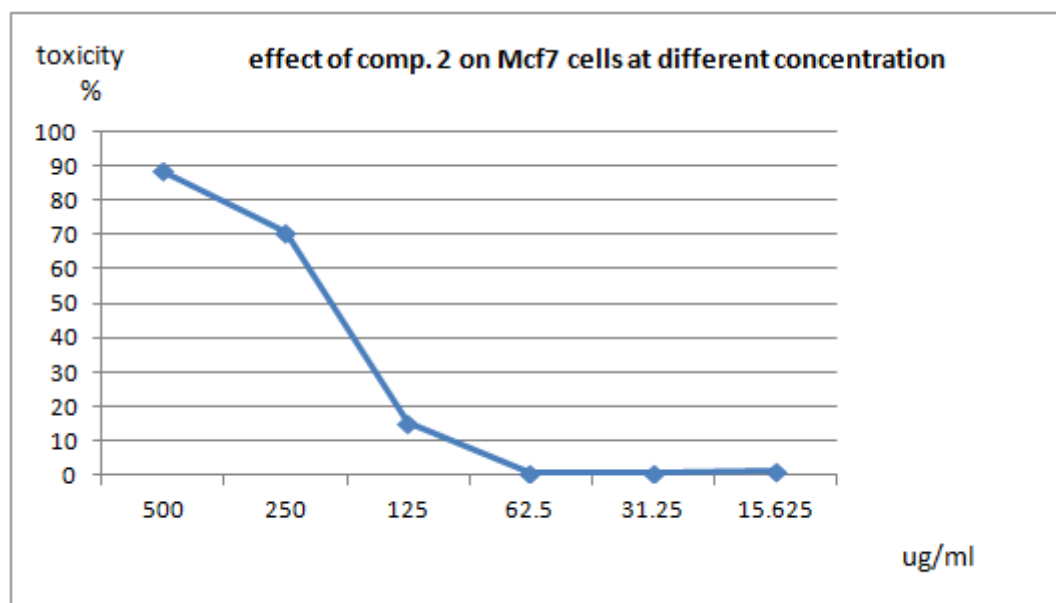

| ID    | Conc.<br>ug/ml | O.D   |       |       | Mean<br>O.D | ST.E     | Viability % | Toxicity %  | IC50    |
|-------|----------------|-------|-------|-------|-------------|----------|-------------|-------------|---------|
| Panc1 | dilution       | 0.374 | 0.361 | 0.369 | 0.368       | 0.003786 | 100         | 0           | ug      |
| 1     | 500            | 0.111 | 0.105 | 0.112 | 0.109333    | 0.002186 | 29.71014493 | 70.28985507 | 250.824 |
|       | 250            | 0.197 | 0.152 | 0.184 | 0.177667    | 0.013371 | 48.27898551 | 51.72101449 |         |
|       | 125            | 0.336 | 0.341 | 0.336 | 0.337667    | 0.001667 | 91.75724638 | 8.242753623 |         |
|       | 62.5           | 0.364 | 0.373 | 0.365 | 0.367333    | 0.002848 | 99.81884058 | 0.18115942  |         |
|       | 31.25          | 0.363 | 0.375 | 0.372 | 0.37        | 0.003606 | 100.5434783 | 0           |         |
|       | 15.625         | 0.374 | 0.361 | 0.369 | 0.368       | 0.003786 | 100         | 0           |         |
| 2     | 500            | 0.11  | 0.102 | 0.103 | 0.105       | 0.002517 | 28.5326087  | 71.4673913  | 195.396 |
|       | 250            | 0.093 | 0.097 | 0.085 | 0.091667    | 0.003528 | 24.90942029 | 75.09057971 |         |
|       | 125            | 0.311 | 0.325 | 0.319 | 0.318333    | 0.004055 | 86.50362319 | 13.49637681 |         |
|       | 62.5           | 0.373 | 0.365 | 0.369 | 0.369       | 0.002309 | 100.2717391 | 0           |         |
|       | 31.25          | 0.364 | 0.369 | 0.368 | 0.367       | 0.001528 | 99.72826087 | 0.27173913  |         |
|       | 15.625         | 0.371 | 0.362 | 0.373 | 0.368667    | 0.003383 | 100.1811594 | 0           |         |

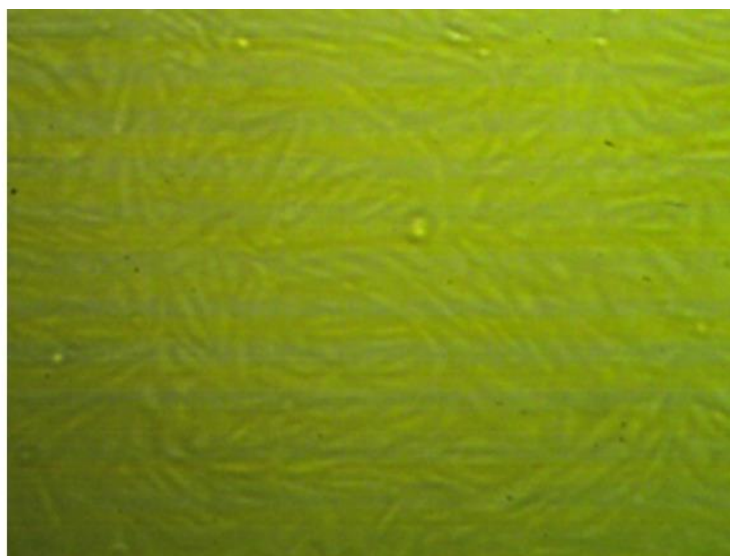

**control  
PANC1 cells**

Organism: *Homo sapiens*, human  
Tissue : pancreas/duct  
Cell Type : epithelial  
Culture Properties : adherent  
Disease : epithelioid carcinoma



## Effect of comp. 1 on Panc1 cells at different concentration

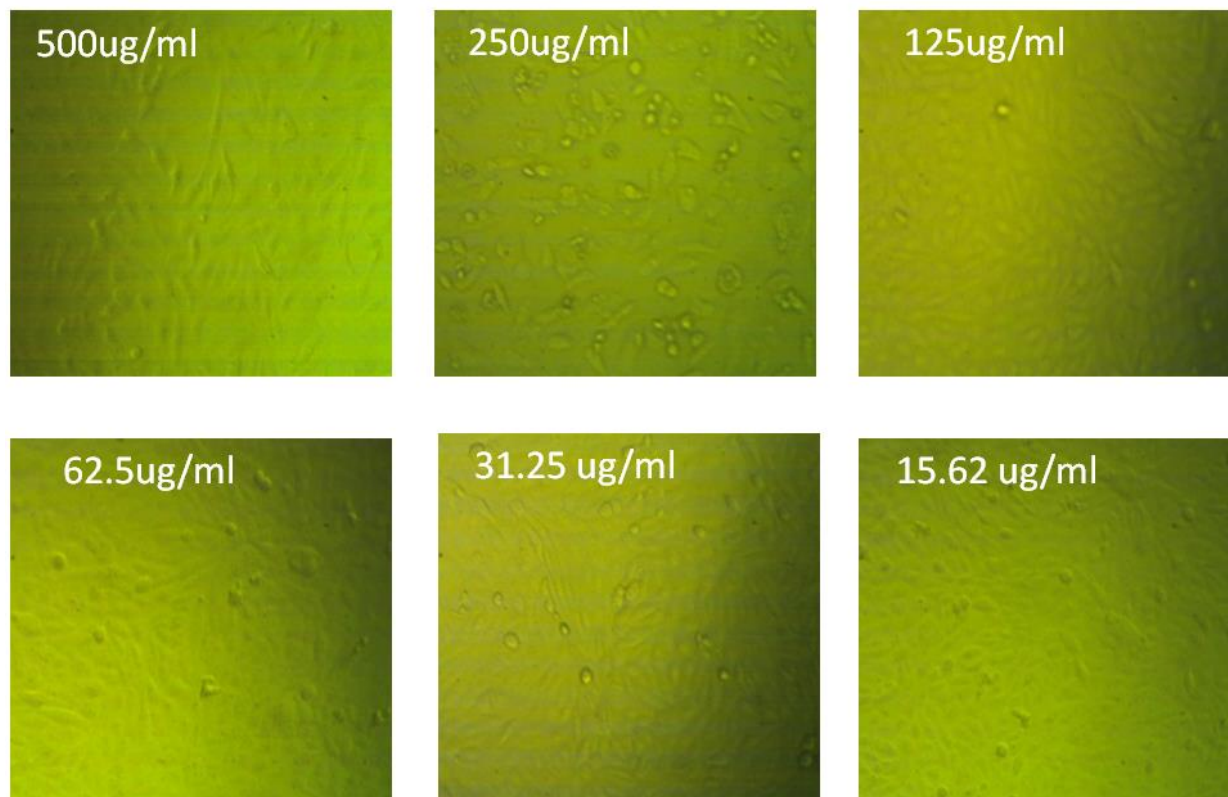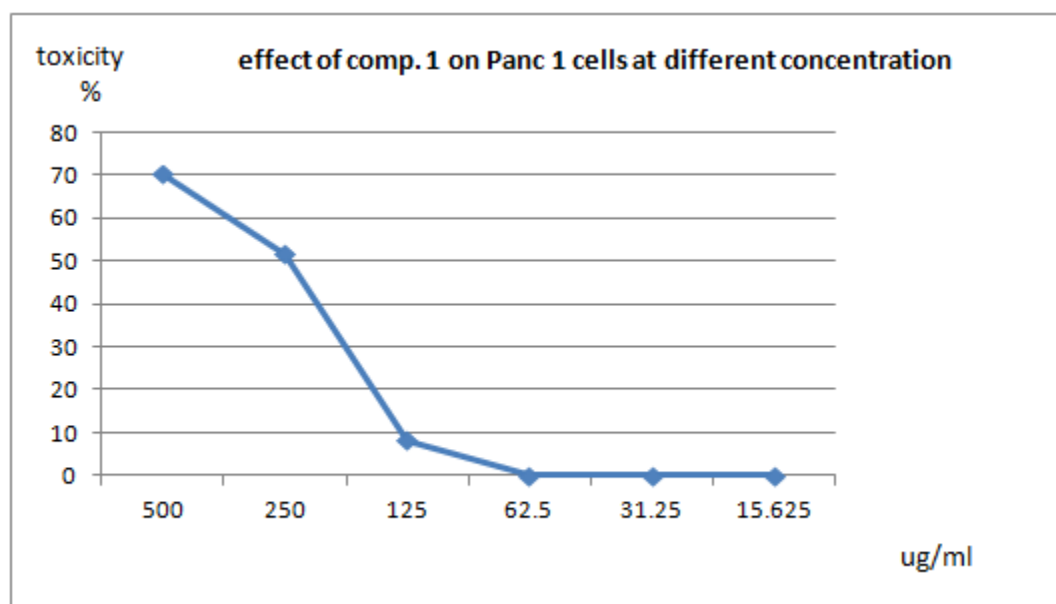

## Effect of comp. 2 on Panc1 cells at different concentration

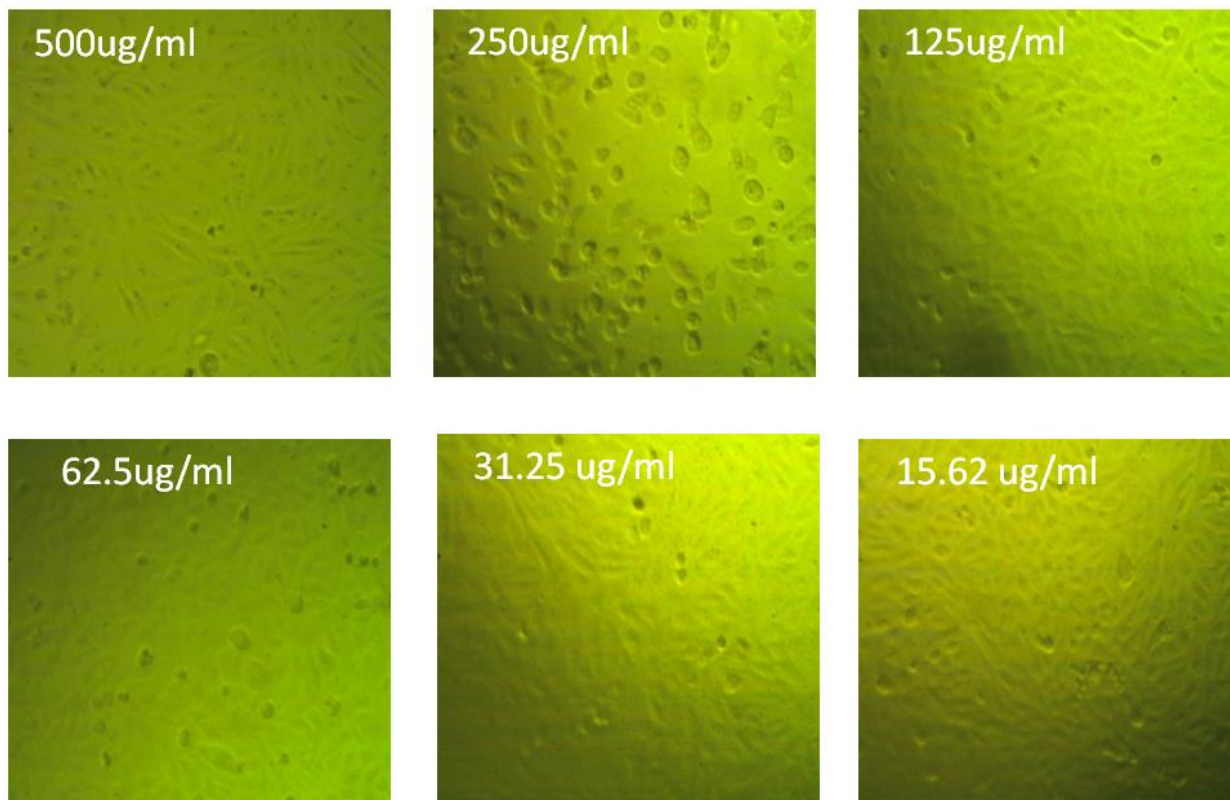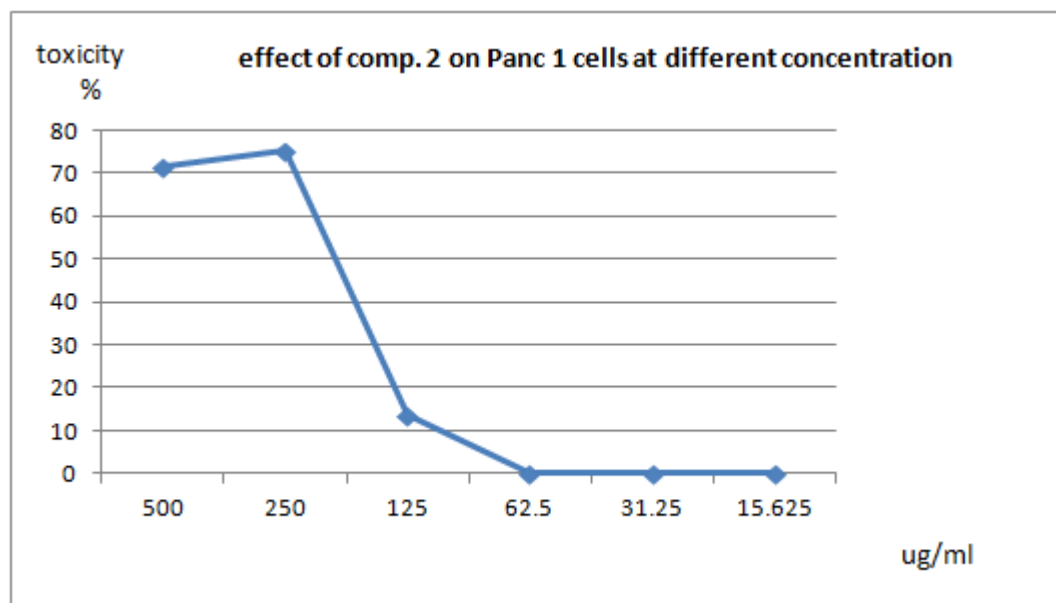

| ID   | Conc.<br>ug/ml | O.D   |       |       | Mean<br>O.D | ST.E     | Viability % | Toxicity %  | IC50    |
|------|----------------|-------|-------|-------|-------------|----------|-------------|-------------|---------|
| vero | dilution       | 0.273 | 0.283 | 0.266 | 0.274       | 0.004933 | 100         | 0           | ug      |
| 1    | 500            | 0.043 | 0.052 | 0.054 | 0.049667    | 0.003383 | 18.12652068 | 81.87347932 | 175.973 |
|      | 250            | 0.06  | 0.054 | 0.074 | 0.062667    | 0.005925 | 22.87104623 | 77.12895377 |         |
|      | 125            | 0.174 | 0.169 | 0.18  | 0.174333    | 0.00318  | 63.62530414 | 36.37469586 |         |
|      | 62.5           | 0.276 | 0.273 | 0.267 | 0.272       | 0.002646 | 99.27007299 | 0.729927007 |         |
|      | 31.25          | 0.266 | 0.273 | 0.275 | 0.271333    | 0.002728 | 99.02676399 | 0.97323601  |         |
|      | 15.625         | 0.276 | 0.268 | 0.271 | 0.271667    | 0.002333 | 99.14841849 | 0.851581509 |         |
| 2    | 500            | 0.046 | 0.051 | 0.047 | 0.048       | 0.001528 | 17.51824818 | 82.48175182 | 195.688 |
|      | 250            | 0.086 | 0.09  | 0.097 | 0.091       | 0.003215 | 33.21167883 | 66.78832117 |         |
|      | 125            | 0.187 | 0.193 | 0.197 | 0.192333    | 0.002906 | 70.1946472  | 29.8053528  |         |
|      | 62.5           | 0.264 | 0.258 | 0.263 | 0.261667    | 0.001856 | 95.49878345 | 4.501216545 |         |
|      | 31.25          | 0.274 | 0.276 | 0.269 | 0.273       | 0.002082 | 99.6350365  | 0.364963504 |         |
|      | 15.625         | 0.277 | 0.276 | 0.269 | 0.274       | 0.002517 | 100         | 0           |         |

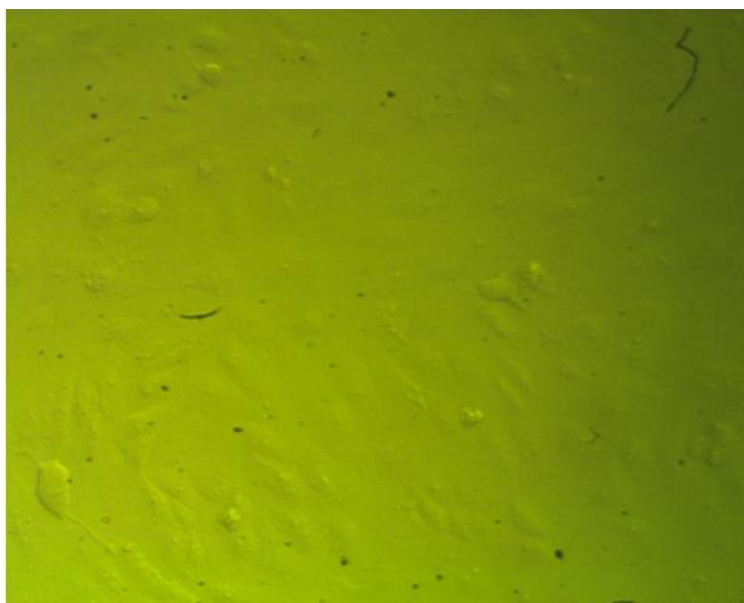

**control  
vero cells**

Organism : *Cercopithecus aethiops*  
Tissue : kidney  
Cell Type : epithelial  
Culture Properties : adherent  
Disease : normal  
ATCC : CCL-81

## Effect of comp. 1 on vero cells at different concentration

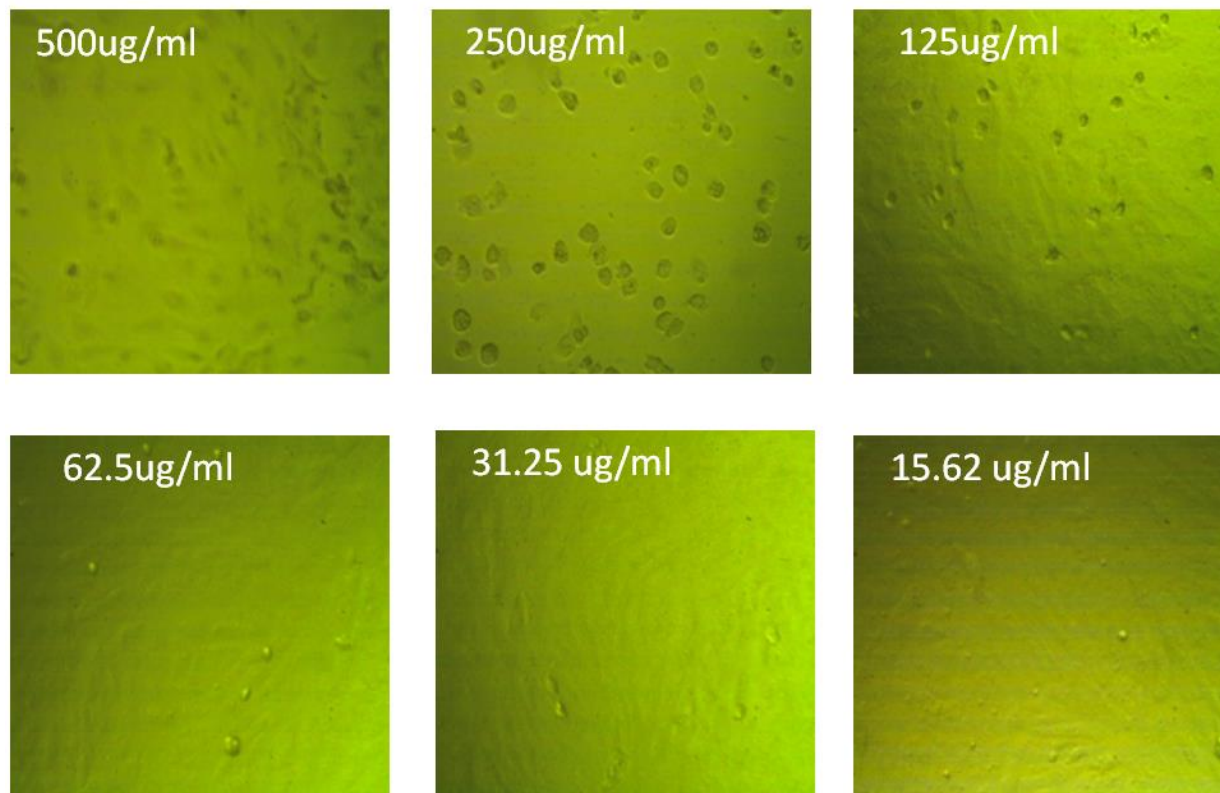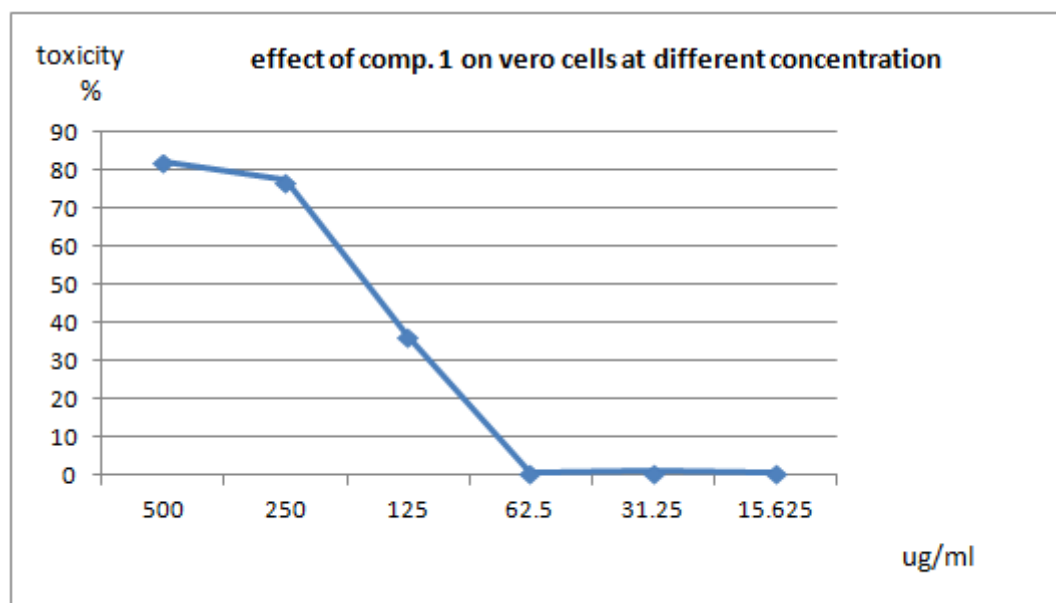



## Effect of comp. 2 on vero cells at different concentration

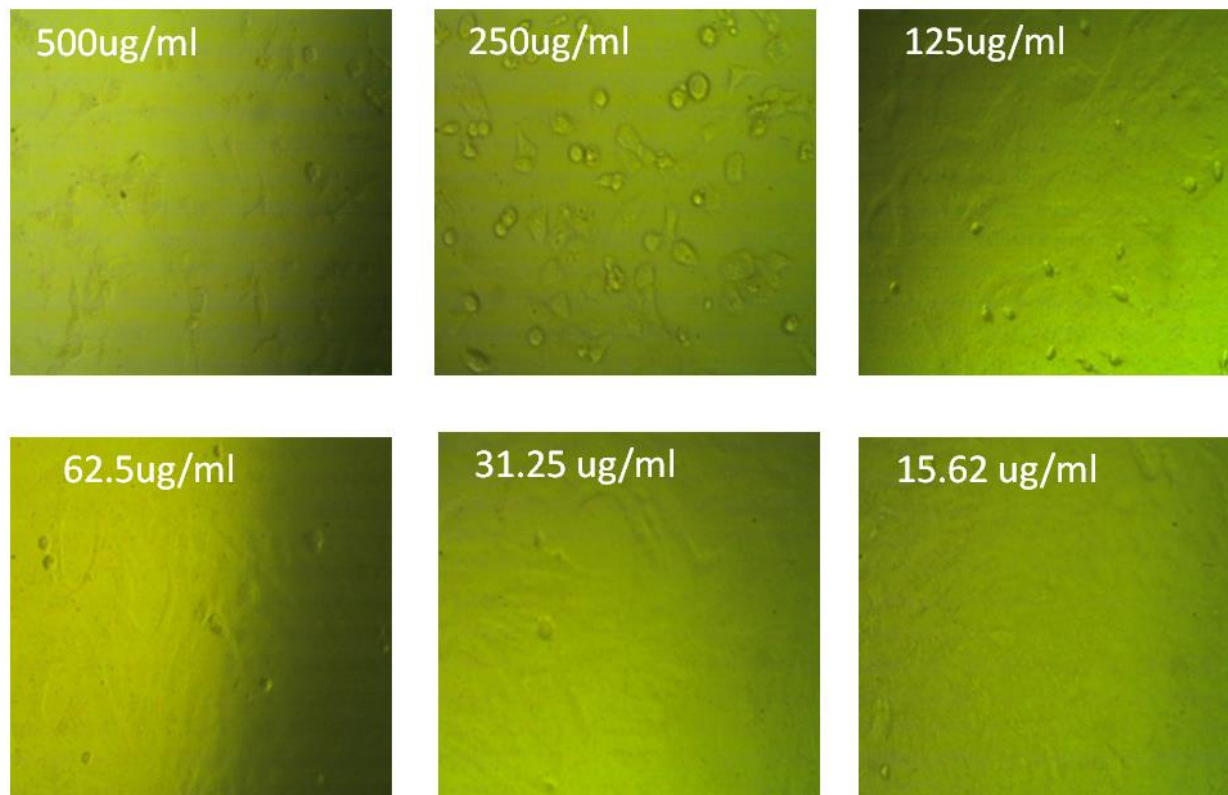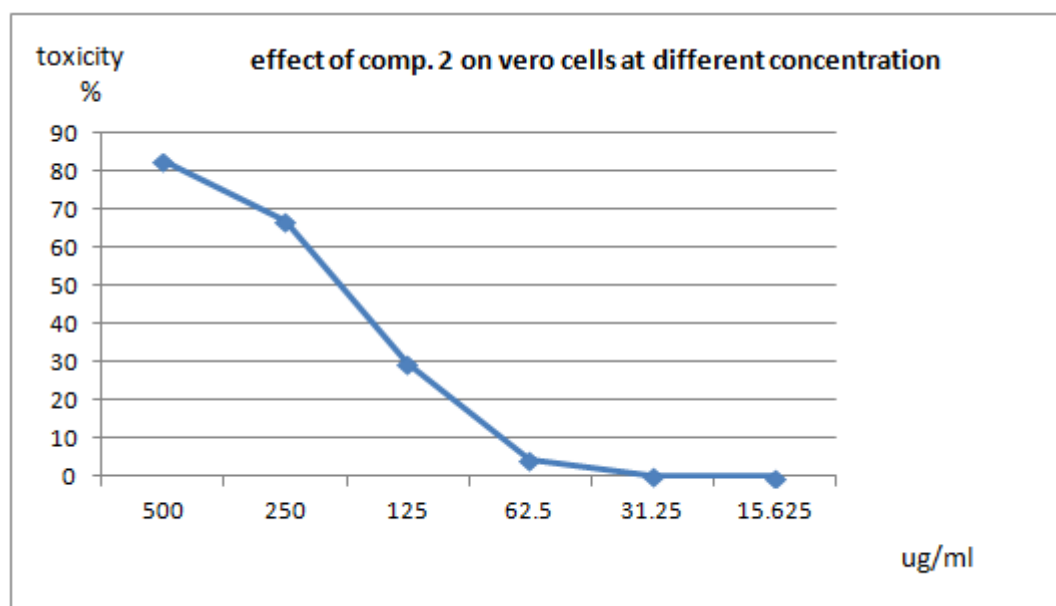

Supplement: s1 [file s1]
