# Supplementary material for: Development of Semisynthetic Apoptosis-Inducing Agents Based on Natural Phenolic Acids Scaffold: Design, Synthesis and In-Vitro Biological Evaluation
Source: MDPI journal article supplement (doi:10.3390/molecules27196724), 2022-10-09
Supplement: s1 [file s1]

**Researcher** : DR Moh.Abdelbasir email: m\_a\_baser@yahoo.com mob.01  
**Assay** : RT-PCR  
**Samples** : 12 Samples  
**Cell lines** : ----  
**Ref.** : ----  
**Date** : 25-06-2019  
**Reader** : Rotorgene RT- PCR system  
**Kit used** : Qiagen RNA extraction/BioRad syber green PCR MMX  
**Solvent** : DMSO  
**Assay samples** :Cell culture Lysate

### Key for sample codes

| Cpd. No. | Cpd. No. | Cpd. No. | Cpd. No. |
|----------|----------|----------|----------|
| CA1      | 3        | FA1      | 12       |
| CA2      | 4        | FA2      | 13       |
| CA3      | 5        | FA3      | 14       |
| CA5      | 6        | FA5      | 15       |
| CA6      | 7        | FA7      | 16       |
| CA7      | 8        | FA8      | 17       |
| CA9      | 9        | FA9      | 18       |
| CA11     | 10       | FA11     | 19       |
| CA12     | 11       | FA12     | 20       |

# RT-PCR

## Report

| Sample data |               |      | Gene expression |            |           |            |
|-------------|---------------|------|-----------------|------------|-----------|------------|
| Ser         | Sample code   | conc | Fold Change     |            |           |            |
|             |               |      | fld             |            |           |            |
|             |               |      | Casp3           | P53        | Bcl2      | Bax        |
| 1           | s1/Caco2 (CA) |      | 3.71±0.14       | 1.69±0.07  | 0.42±0.01 | 2.55±0.14  |
| 2           | s2/Caco2 (FA) |      | 7.82±0.28       | 3.98±0.15  | 0.63±0.04 | 5.24±0.26  |
| 3           | CA3/Caco2     |      | 2.47±0.09       | 2.14±0.16  | 0.45±0.02 | 3.95±0.28  |
| 4           | CA6/Caco2     |      | 12.62±0.81      | 9.29±0.64  | 0.69±0.04 | 6.76±0.26  |
| 5           | CA9/Caco2     |      | 5.51±0.22       | 3.27±0.22  | 0.89±0.06 | 3.04±0.21  |
| 6           | CA11/Caco2    |      | 16.39±0.84      | 14.52±0.88 | 0.47±0.02 | 15.57±0.14 |
| 7           | CA12/Caco2    |      | 5.41±0.19       | 7.68±0.39  | 0.18±0.01 | 3.95±0.21  |
| 8           | FA3/Caco2     |      | 9.78±0.34       | 11.18±0.72 | 0.40±0.02 | 5.91±0.36  |
| 9           | FA5/Caco2     |      | 15.57±0.67      | 10.56±0.75 | 0.19±0.01 | 15.38±0.88 |
| 10          | FA8/Caco2     |      | 5.04±0.26       | 3.14±0.18  | 0.77±0.05 | 5.84±0.24  |
| 11          | FA9/Caco2     |      | 6.02±0.33       | 5.87±0.27  | 0.58±0.03 | 6.06±0.41  |
| 12          | FA12/Caco2    |      | 4.64±0.18       | 3.98±0.16  | 0.37±0.02 | 3.33±0.16  |
| ***         | cont.Caco2    |      | 1               | 1          | 1         | 1          |

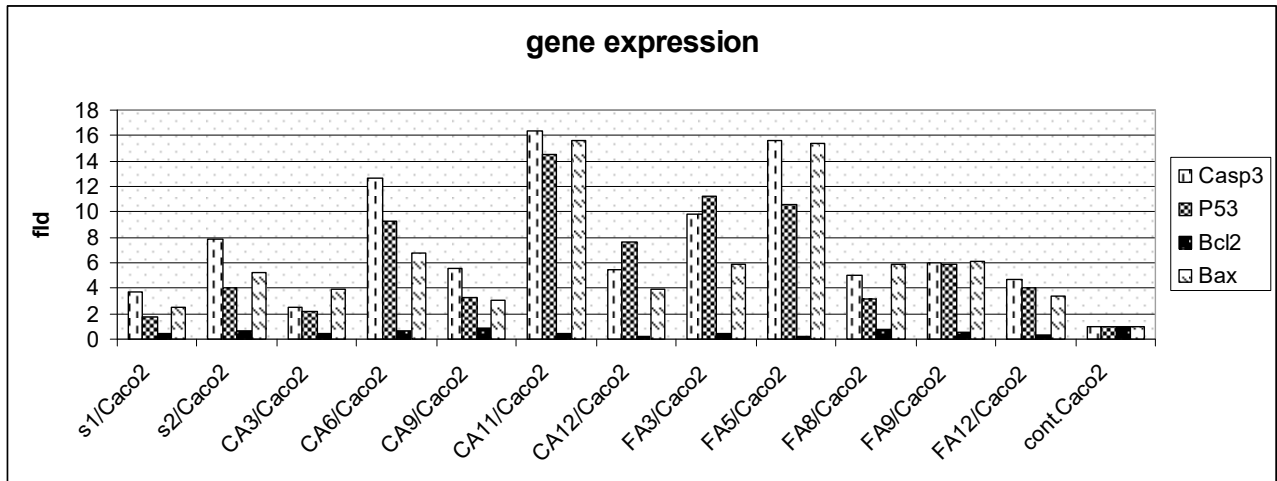

# Quantitation Report

## Experiment Information

|                         |                             |
|-------------------------|-----------------------------|
| Run Name                | Run 2019-06-29 (1)          |
| Run Start               | 2019-06-29 04:08:13 PM      |
| Run Finish              | 2019-06-29 06:41:18 PM      |
| Operator                | ER                          |
| Notes                   | ---                         |
| Run On Software Version | Rotor-Gene 1.7.87           |
| Run Signature           | The Run Signature is valid. |
| Gain Green              | 10.                         |
| Gain Yellow             | 9.33                        |

## Quantitation data

This report generated by Rotor-Gene 6000 Series Software 1.7 (Build 87)  
 Copyright © 2000-2006 Corbett Research, a Division of Corbett Life Science. All rights reserved.  
 ISO 9001:2000 (Reg. No. QEC21313)

### primers

p53 F 5'-CCCCTCCTGGCCCCTGTCATCTTC-3',  
 p53 R 5'-GCAGCGCCTCACAACCTCCGTCAT-3'.

bcl-2 F 5'-CCTGTG GAT GAC TGA GTA CC-3'  
 bcl-2 R 5'-GAGACA GCC AGG AGA AAT CA-3'

CASP3-F 5'-TTC ATT ATT CAG GCC TGC CGA GG-3'  
 CASP3-R 5'-TTC TGA CAG GCC ATG TCA TCC TCA-3'

Bax F 5'-GTTTCA TCC AGG ATC GAG CAG-3'  
 Bax R 5'-CATCTT CTT CCA GAT GGT GA-3'

β-actin F 5'-GTGACATCCACACCCAGAGG-3'  
 β-actin R 5'-ACAGGATGTCAAACTGCCC-3'

| Sample data |             | Casp3         |       |              |            |       |              |                                        |                                            |
|-------------|-------------|---------------|-------|--------------|------------|-------|--------------|----------------------------------------|--------------------------------------------|
|             |             | Control cells |       |              | Test cells |       |              |                                        | FLD                                        |
|             |             | B Actin       | Casp3 | $\Delta$ CTC | B Actin    | Casp3 | $\Delta$ CTE | $\Delta\Delta$ CT                      | $2^{\Delta\Delta\Delta\Delta\Delta\Delta}$ |
| Ser         | Sample code | HC            | TC    | TC-HC        | HE         | TE    | TE-HE        | $\Delta\Delta\Delta\Delta\Delta\Delta$ | Eamp=1.891                                 |
| 1           | s1/Caco2    | 26.42         | 34.21 | 7.79         | 25.75      | 31.48 | 5.73         | -2.06                                  | 3.71522                                    |
| 2           | s2/Caco2    | 26.42         | 34.21 | 7.79         | 26.16      | 30.72 | 4.56         | -3.23                                  | 7.829132                                   |
| 3           | CA3/Caco2   | 26.42         | 34.21 | 7.79         | 25.92      | 32.29 | 6.37         | -1.42                                  | 2.471166                                   |
| 4           | CA6/Caco2   | 26.42         | 34.21 | 7.79         | 26.04      | 29.85 | 3.81         | -3.98                                  | 12.62503                                   |
| 5           | CA9/Caco2   | 26.42         | 34.21 | 7.79         | 25.88      | 30.99 | 5.11         | -2.68                                  | 5.514845                                   |
| 6           | CA11/Caco2  | 26.42         | 34.21 | 7.79         | 26.31      | 29.71 | 3.4          | -4.39                                  | 16.39366                                   |
| 7           | CA12/Caco2  | 26.42         | 34.21 | 7.79         | 25.95      | 31.09 | 5.14         | -2.65                                  | 5.41044                                    |
| 8           | FA3/Caco2   | 26.42         | 34.21 | 7.79         | 26.13      | 30.34 | 4.21         | -3.58                                  | 9.784884                                   |
| 9           | FA5/Caco2   | 26.42         | 34.21 | 7.79         | 25.78      | 29.26 | 3.48         | -4.31                                  | 15.57903                                   |
| 10          | FA8/Caco2   | 26.42         | 34.21 | 7.79         | 26.02      | 31.27 | 5.25         | -2.54                                  | 5.044249                                   |
| 11          | FA9/Caco2   | 26.42         | 34.21 | 7.79         | 25.62      | 30.59 | 4.97         | -2.82                                  | 6.029345                                   |
| 12          | FA12/Caco2  | 26.42         | 34.21 | 7.79         | 26.16      | 31.54 | 5.38         | -2.41                                  | 4.643298                                   |
| 13          | cont .Caco2 | 26.42         | 34.21 | 7.79         | 26.42      | 34.21 | 7.79         | 0                                      | 1                                          |

| Sample data |             | p53           |       |              |            |       |              |                                        |                                            |
|-------------|-------------|---------------|-------|--------------|------------|-------|--------------|----------------------------------------|--------------------------------------------|
|             |             | Control cells |       |              | Test cells |       |              |                                        | FLD                                        |
|             |             | B Actin       | p53   | $\Delta$ CTC | B Actin    | p53   | $\Delta$ CTE | $\Delta\Delta$ CT                      | $2^{\Delta\Delta\Delta\Delta\Delta\Delta}$ |
| Ser         | Sample code | HC            | TC    | TC-HC        | HE         | TE    | TE-HE        | $\Delta\Delta\Delta\Delta\Delta\Delta$ | Eamp=1.891                                 |
| 1           | s1/Caco2    | 26.42         | 33.92 | 7.5          | 25.75      | 32.42 | 6.67         | -0.83                                  | 1.696891                                   |
| 2           | s2/Caco2    | 26.42         | 33.92 | 7.5          | 26.16      | 31.49 | 5.33         | -2.17                                  | 3.984929                                   |
| 3           | CA3/Caco2   | 26.42         | 33.92 | 7.5          | 25.92      | 32.22 | 6.3          | -1.2                                   | 2.147978                                   |
| 4           | CA6/Caco2   | 26.42         | 33.92 | 7.5          | 26.04      | 30.04 | 4            | -3.5                                   | 9.29866                                    |
| 5           | CA9/Caco2   | 26.42         | 33.92 | 7.5          | 25.88      | 31.52 | 5.64         | -1.86                                  | 3.270742                                   |
| 6           | CA11/Caco2  | 26.42         | 33.92 | 7.5          | 26.31      | 29.61 | 3.3          | -4.2                                   | 14.52461                                   |
| 7           | CA12/Caco2  | 26.42         | 33.92 | 7.5          | 25.95      | 30.25 | 4.3          | -3.2                                   | 7.680914                                   |
| 8           | FA3/Caco2   | 26.42         | 33.92 | 7.5          | 26.13      | 29.84 | 3.71         | -3.79                                  | 11.18564                                   |
| 9           | FA5/Caco2   | 26.42         | 33.92 | 7.5          | 25.78      | 29.58 | 3.8          | -3.7                                   | 10.5623                                    |
| 10          | FA8/Caco2   | 26.42         | 33.92 | 7.5          | 26.02      | 31.72 | 5.7          | -1.8                                   | 3.148073                                   |
| 11          | FA9/Caco2   | 26.42         | 33.92 | 7.5          | 25.62      | 30.34 | 4.72         | -2.78                                  | 5.877633                                   |
| 12          | FA12/Caco2  | 26.42         | 33.92 | 7.5          | 26.16      | 31.49 | 5.33         | -2.17                                  | 3.984929                                   |
| 13          | cont .Caco2 | 26.42         | 33.92 | 7.5          | 26.42      | 33.92 | 7.5          | 0                                      | 1                                          |

| Sample data |             | Bcl2          |       |       |            |       |       |           |                     |
|-------------|-------------|---------------|-------|-------|------------|-------|-------|-----------|---------------------|
| Ser         | Sample code | Control cells |       |       | Test cells |       |       |           | FLD                 |
|             |             | B Actin       | Bcl2  | ΔCTC  | B Actin    | Bcl2  | ΔCTE  | ΔΔ CT     | 2 <sup>Δ</sup> ΔΔCT |
|             |             | HC            | TC    | TC-HC | HE         | TE    | TE-HE | ΔCTE-ΔCTC | Eamp=1.891          |
| 1           | s1/Caco2    | 26.42         | 30.47 | 4.05  | 25.75      | 31.15 | 5.4   | 1.35      | 0.423123            |
| 2           | s2/Caco2    | 26.42         | 30.47 | 4.05  | 26.16      | 30.92 | 4.76  | 0.71      | 0.636135            |
| 3           | CA3/Caco2   | 26.42         | 30.47 | 4.05  | 25.92      | 31.19 | 5.27  | 1.22      | 0.45966             |
| 4           | CA6/Caco2   | 26.42         | 30.47 | 4.05  | 26.04      | 30.66 | 4.62  | 0.57      | 0.695482            |
| 5           | CA9/Caco2   | 26.42         | 30.47 | 4.05  | 25.88      | 30.11 | 4.23  | 0.18      | 0.891652            |
| 6           | CA11/Caco2  | 26.42         | 30.47 | 4.05  | 26.31      | 31.54 | 5.23  | 1.18      | 0.471524            |
| 7           | CA12/Caco2  | 26.42         | 30.47 | 4.05  | 25.95      | 32.62 | 6.67  | 2.62      | 0.188394            |
| 8           | FA3/Caco2   | 26.42         | 30.47 | 4.05  | 26.13      | 31.61 | 5.48  | 1.43      | 0.402097            |
| 9           | FA5/Caco2   | 26.42         | 30.47 | 4.05  | 25.78      | 32.42 | 6.64  | 2.59      | 0.19203             |
| 10          | FA8/Caco2   | 26.42         | 30.47 | 4.05  | 26.02      | 30.46 | 4.44  | 0.39      | 0.779992            |
| 11          | FA9/Caco2   | 26.42         | 30.47 | 4.05  | 25.62      | 30.51 | 4.89  | 0.84      | 0.58557             |
| 12          | FA12/Caco2  | 26.42         | 30.47 | 4.05  | 26.16      | 31.76 | 5.6   | 1.55      | 0.372502            |
| 13          | cont .Caco2 | 26.42         | 30.47 | 4.05  | 26.42      | 30.47 | 4.05  | 0         | 1                   |

| Sample data |             | Bax           |       |       |            |       |       |           |                     |
|-------------|-------------|---------------|-------|-------|------------|-------|-------|-----------|---------------------|
| Ser         | Sample code | Control cells |       |       | Test cells |       |       |           | FLD                 |
|             |             | B Actin       | Bax   | ΔCTC  | B Actin    | Bax   | ΔCTE  | ΔΔ CT     | 2 <sup>Δ</sup> ΔΔCT |
|             |             | HC            | TC    | TC-HC | HE         | TE    | TE-HE | ΔCTE-ΔCTC | Eamp=1.891          |
| 1           | s1/Caco2    | 26.42         | 34.71 | 8.29  | 25.75      | 32.57 | 6.82  | -1.47     | 2.551153            |
| 2           | s2/Caco2    | 26.42         | 34.71 | 8.29  | 26.16      | 31.85 | 5.69  | -2.6      | 5.240805            |
| 3           | CA3/Caco2   | 26.42         | 34.71 | 8.29  | 25.92      | 32.05 | 6.13  | -2.16     | 3.959622            |
| 4           | CA6/Caco2   | 26.42         | 34.71 | 8.29  | 26.04      | 31.33 | 5.29  | -3        | 6.761991            |
| 5           | CA9/Caco2   | 26.42         | 34.71 | 8.29  | 25.88      | 32.42 | 6.54  | -1.75     | 3.04937             |
| 6           | CA11/Caco2  | 26.42         | 34.71 | 8.29  | 26.31      | 30.29 | 3.98  | -4.31     | 15.57903            |
| 7           | CA12/Caco2  | 26.42         | 34.71 | 8.29  | 25.95      | 32.08 | 6.13  | -2.16     | 3.959622            |
| 8           | FA3/Caco2   | 26.42         | 34.71 | 8.29  | 26.13      | 31.63 | 5.5   | -2.79     | 5.915199            |
| 9           | FA5/Caco2   | 26.42         | 34.71 | 8.29  | 25.78      | 29.78 | 4     | -4.29     | 15.38178            |
| 10          | FA8/Caco2   | 26.42         | 34.71 | 8.29  | 26.02      | 31.54 | 5.52  | -2.77     | 5.840305            |
| 11          | FA9/Caco2   | 26.42         | 34.71 | 8.29  | 25.62      | 31.08 | 5.46  | -2.83     | 6.067881            |
| 12          | FA12/Caco2  | 26.42         | 34.71 | 8.29  | 26.16      | 32.56 | 6.4   | -1.89     | 3.333857            |
| 13          | cont .Caco2 | 26.42         | 34.71 | 8.29  | 26.42      | 34.71 | 8.29  | 0         | 1                   |
