# Supplementary material for: Development of Semisynthetic Apoptosis-Inducing Agents Based on Natural Phenolic Acids Scaffold: Design, Synthesis and In-Vitro Biological Evaluation
Source: MDPI journal article supplement (doi:10.3390/molecules27196724), 2022-10-09
Supplement: s1 [file s1]

|                   |                                            |         |      |
|-------------------|--------------------------------------------|---------|------|
| <b>Researcher</b> | : Dr/Noura                                 | email:  | mob. |
| Assay             | : MMP2,9 RT-PCR                            |         |      |
| Samples           | : 13 Samples                               |         |      |
| Cell lines        | : Caco2                                    |         |      |
| Ref.              | : ----                                     |         |      |
| Date              | : 19-10-2019                               |         |      |
| Reader            | : Rotorgene RT- PCR system                 |         |      |
| Kit used          | : Qiagen RNA extraction/BioRad syber green | PCR MMX |      |
| Solvent           | : DMSO                                     |         |      |
| Assay samples     | : Cell culture Lysate                      |         |      |

### Key for sample codes

| Cpd. No. | Cpd. No. | Cpd. No. | Cpd. No. |
|----------|----------|----------|----------|
| CA1      | 3        | FA1      | 12       |
| CA2      | 4        | FA2      | 13       |
| CA3      | 5        | FA3      | 14       |
| CA5      | 6        | FA5      | 15       |
| CA6      | 7        | FA7      | 16       |
| CA7      | 8        | FA8      | 17       |
| CA9      | 9        | FA9      | 18       |
| CA11     | 10       | FA11     | 19       |
| CA12     | 11       | FA12     | 20       |

# RT-PCR Report

| Sample data |             |       |      | Results<br>Fold Change |             |
|-------------|-------------|-------|------|------------------------|-------------|
| Ser         | code        | cells | conc | MMP2<br>FLD            | MMP9<br>FLD |
| 1           | CA3         | Caco2 |      | 0.59±0.016             | 0.44±0.009  |
| 2           | CA6         |       |      | 0.16±0.004             | 0.29±0.006  |
| 3           | CA9         |       |      | 0.83±0.022             | 0.70±0.014  |
| 4           | CA11        |       |      | 0.33±0.008             | 0.55±0.011  |
| 5           | CA12        |       |      | 0.54±0.014             | 0.30±0.006  |
| 6           | FA3         |       |      | 0.84±0.022             | 0.73±0.015  |
| 7           | FA5         |       |      | 0.59±0.016             | 0.37±0.007  |
| 8           | FA8         |       |      | 0.15±0.004             | 0.17±0.003  |
| 9           | FA9         |       |      | 0.42±0.011             | 0.52±0.010  |
| 10          | FA12        |       |      | 0.68±0.018             | 0.45±0.009  |
| 11          | 1           |       |      | 0.16±0.004             | 0.24±0.004  |
| 12          | 2           |       |      | 0.76±0.020             | 0.62±0.012  |
| 13          | cont. Caco2 |       |      | 1±0.027                | 1±0.020     |

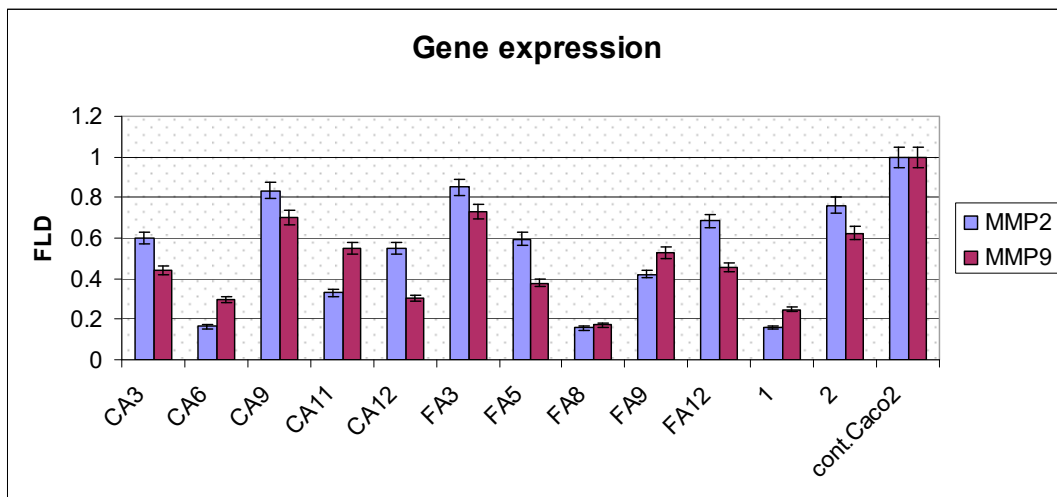

# Quantitation Report

## Experiment Information

|                         |                             |
|-------------------------|-----------------------------|
| Run Name                | Run 2019-10-25 (2)          |
| Run Start               | 2019-10-25 05:08:39 PM      |
| Run Finish              | 2019-10-25 07:46:44 PM      |
| Operator                | EE                          |
| Notes                   | MMP9                        |
| Run On Software Version | Rotor-Gene 1.7.87           |
| Run Signature           | The Run Signature is valid. |
| Gain Green              | 10.                         |
| Gain Yellow             | 9.33                        |

## Quantitation data

| Sample data |                 |            | MMP2          |       |              |            |       |              |                               |                       |
|-------------|-----------------|------------|---------------|-------|--------------|------------|-------|--------------|-------------------------------|-----------------------|
|             |                 |            | Control cells |       |              | Test cells |       |              |                               | FLD                   |
| Se<br>r     | Sample<br>code  | Conc<br>uM | B Actin       | MMP2  | $\Delta$ CTC | B Actin    | MMP2  | $\Delta$ CTE | $\Delta\Delta$ CT             | $2^{\Delta\Delta CT}$ |
|             |                 |            | HC            | TC    | TC-HC        | HE         | TE    | TE-HE        | $\Delta$ CTE-<br>$\Delta$ CTC | Eamp=1.82<br>6        |
| 1           | CA3             |            | 25.57         | 27.92 | 2.35         | 26.36      | 29.56 | 3.2          | 0.85                          | 0.59941               |
| 2           | CA6             |            | 25.57         | 27.92 | 2.35         | 25.81      | 31.17 | 5.36         | 3.01                          | 0.163261              |
| 3           | CA9             |            | 25.57         | 27.92 | 2.35         | 26.17      | 28.82 | 2.65         | 0.3                           | 0.834737              |
| 4           | CA11            |            | 25.57         | 27.92 | 2.35         | 26.22      | 30.41 | 4.19         | 1.84                          | 0.330247              |
| 5           | CA12            |            | 25.57         | 27.92 | 2.35         | 26.09      | 29.44 | 3.35         | 1                             | 0.547645              |
| 6           | FA3             |            | 25.57         | 27.92 | 2.35         | 25.94      | 28.56 | 2.62         | 0.27                          | 0.849953              |
| 7           | FA5             |            | 25.57         | 27.92 | 2.35         | 26.21      | 29.42 | 3.21         | 0.86                          | 0.595812              |
| 8           | FA8             |            | 25.57         | 27.92 | 2.35         | 25.94      | 31.38 | 5.44         | 3.09                          | 0.155583              |
| 9           | FA9             |            | 25.57         | 27.92 | 2.35         | 26.06      | 29.84 | 3.78         | 1.43                          | 0.422721              |
| 10          | FA12            |            | 25.57         | 27.92 | 2.35         | 25.78      | 28.76 | 2.98         | 0.63                          | 0.684313              |
| 11          | 1               |            | 25.57         | 27.92 | 2.35         | 26.13      | 31.52 | 5.39         | 3.04                          | 0.160338              |
| 12          | 2               |            | 25.57         | 27.92 | 2.35         | 25.91      | 28.71 | 2.8          | 0.45                          | 0.762649              |
| 13          | cont. Cac<br>o2 |            | 25.57         | 27.92 | 2.35         | 25.57      | 27.92 | 2.35         | 0                             | 1                     |

| Sample data |                 |            | MMP9          |       |       |            |       |       |               |                             |
|-------------|-----------------|------------|---------------|-------|-------|------------|-------|-------|---------------|-----------------------------|
|             |                 |            | Control cells |       |       | Test cells |       |       |               | FLD                         |
| Ser         | Sample code     | Conc<br>uM | B Actin       | MMP9  | ΔCTC  | B Actin    | MMP9  | ΔCTE  | ΔΔ CT         | 2 <sup>ΔΔCT</sup>           |
|             |                 |            | HC            | TC    | TC-HC | HE         | TE    | TE-HE | ΔCTE-<br>ΔCTC | E <sub>amp</sub> =1.82<br>6 |
| 1           | CA3             |            | 25.57         | 27.92 | 2.35  | 26.36      | 30.07 | 3.71  | 1.36          | 0.440919                    |
| 2           | CA6             |            | 25.57         | 27.92 | 2.35  | 25.81      | 30.17 | 4.36  | 2.01          | 0.298115                    |
| 3           | CA9             |            | 25.57         | 27.92 | 2.35  | 26.17      | 29.11 | 2.94  | 0.59          | 0.700994                    |
| 4           | CA11            |            | 25.57         | 27.92 | 2.35  | 26.22      | 29.56 | 3.34  | 0.99          | 0.550953                    |
| 5           | CA12            |            | 25.57         | 27.92 | 2.35  | 26.09      | 30.41 | 4.32  | 1.97          | 0.305382                    |
| 6           | FA3             |            | 25.57         | 27.92 | 2.35  | 25.94      | 28.81 | 2.87  | 0.52          | 0.731172                    |
| 7           | FA5             |            | 25.57         | 27.92 | 2.35  | 26.21      | 30.17 | 3.96  | 1.61          | 0.379301                    |
| 8           | FA8             |            | 25.57         | 27.92 | 2.35  | 25.94      | 31.23 | 5.29  | 2.94          | 0.170289                    |
| 9           | FA9             |            | 25.57         | 27.92 | 2.35  | 26.06      | 29.47 | 3.41  | 1.06          | 0.528213                    |
| 10          | FA12            |            | 25.57         | 27.92 | 2.35  | 25.78      | 29.43 | 3.65  | 1.3           | 0.45714                     |
| 11          | 1               |            | 25.57         | 27.92 | 2.35  | 26.13      | 30.79 | 4.66  | 2.31          | 0.248847                    |
| 12          | 2               |            | 25.57         | 27.92 | 2.35  | 25.91      | 29.04 | 3.13  | 0.78          | 0.625215                    |
| 13          | cont. Ca<br>co2 |            | 25.57         | 27.92 | 2.35  | 25.57      | 27.92 | 2.35  | 0             | 1                           |

This report generated by Rotor-Gene 6000 Series Software 1.7 (Build 87)  
 Copyright ©2000-2006 Corbett Research, a Division of Corbett Life Science. All rights reserved.  
 ISO 9001:2000 (Reg. No. QEC21313)

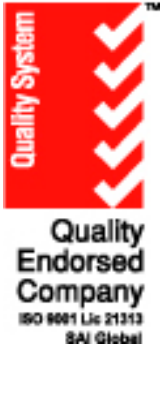

|                                         |
|-----------------------------------------|
|                                         |
| primers                                 |
|                                         |
| MMP2 F 5' - CAAAAACAAGAAGACATACATCTT-3' |
| MMP2 F 5' - CAAAAACAAGAAGACATACATCTT-3' |
|                                         |
| MMP9 F 5' - TGGGGGGCAACTCGGC-3'         |
| MMP9 R 5' - GGAATGATCTAAGCCCAG-3'       |
|                                         |
| β-actin F 5' -GTGACATCCACACCCAGAGG-3'   |
| β-actin R 5' -ACAGGATGTCAAACTGCCC-3'    |
|                                         |
