# Supplementary material for: Development of Semisynthetic Apoptosis-Inducing Agents Based on Natural Phenolic Acids Scaffold: Design, Synthesis and In-Vitro Biological Evaluation
Source: MDPI journal article supplement (doi:10.3390/molecules27196724), 2022-10-09
Supplement: s1 [file s1]

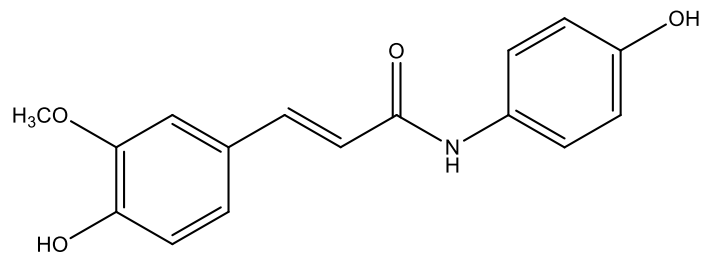

SpinWorks 2.5: Omar Adel\_H\_FA2

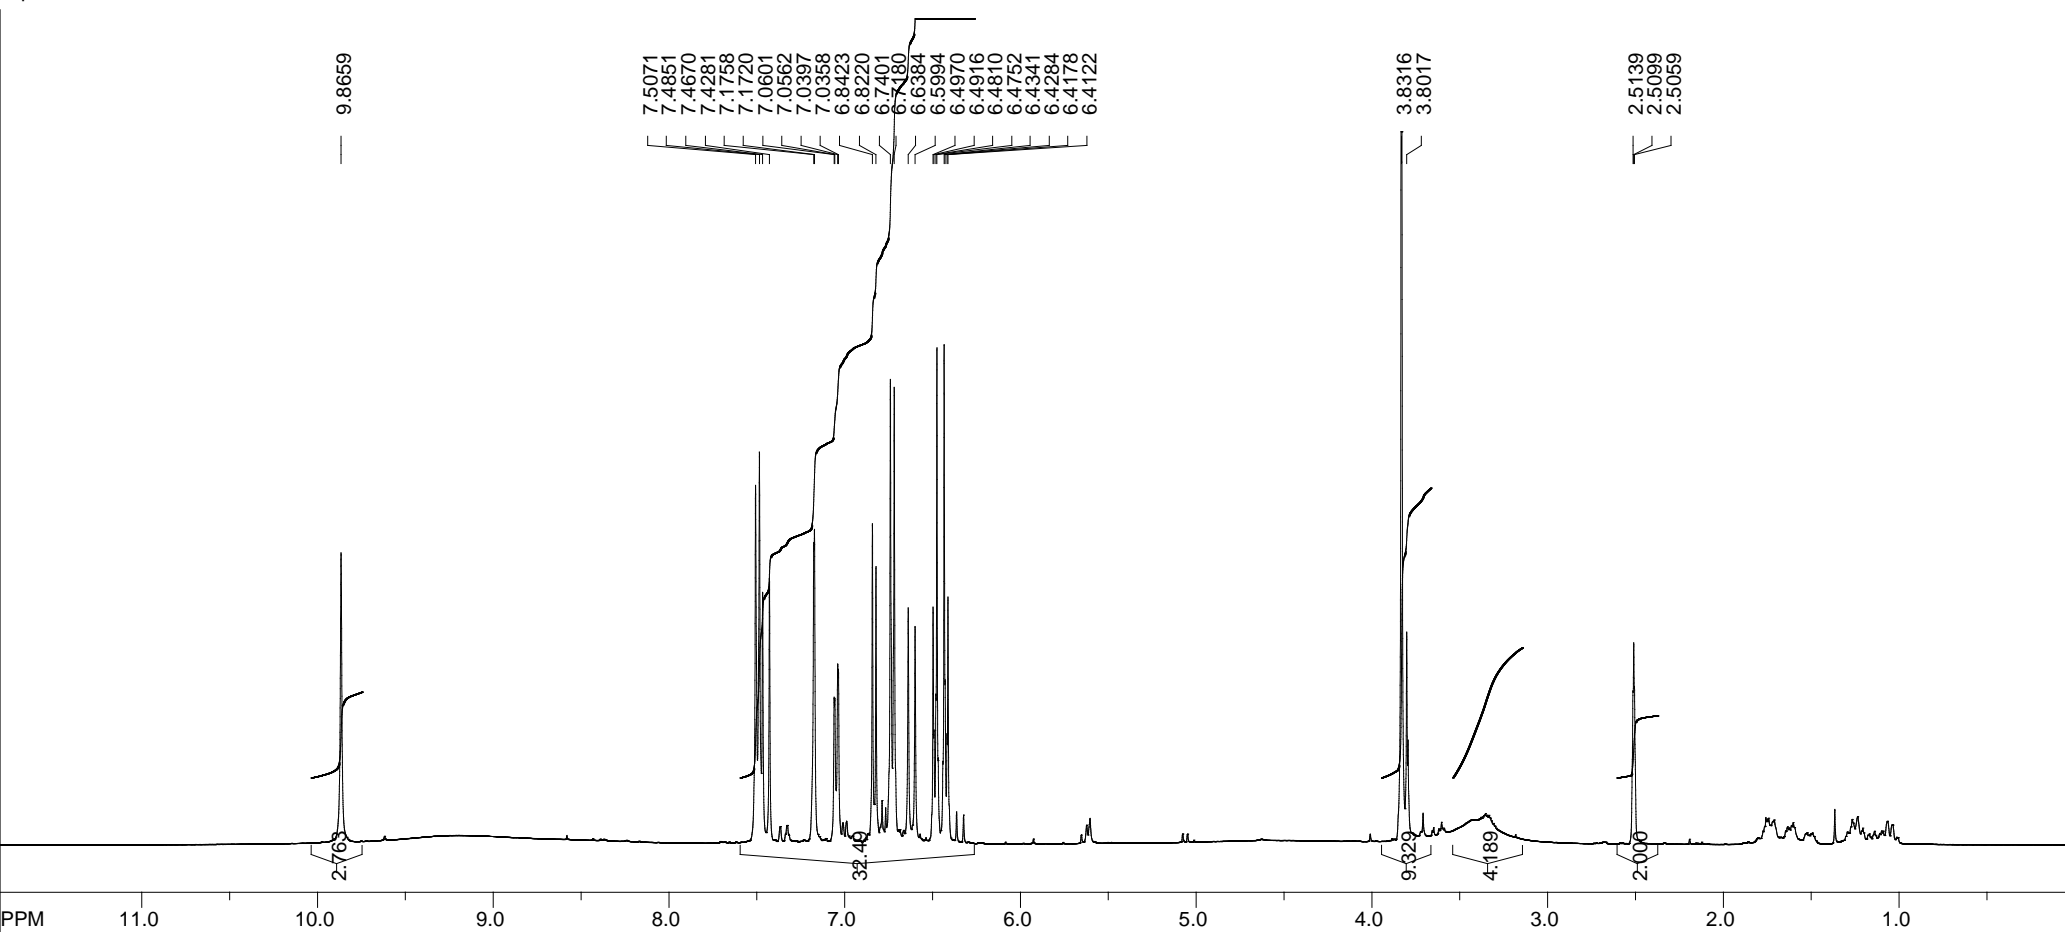

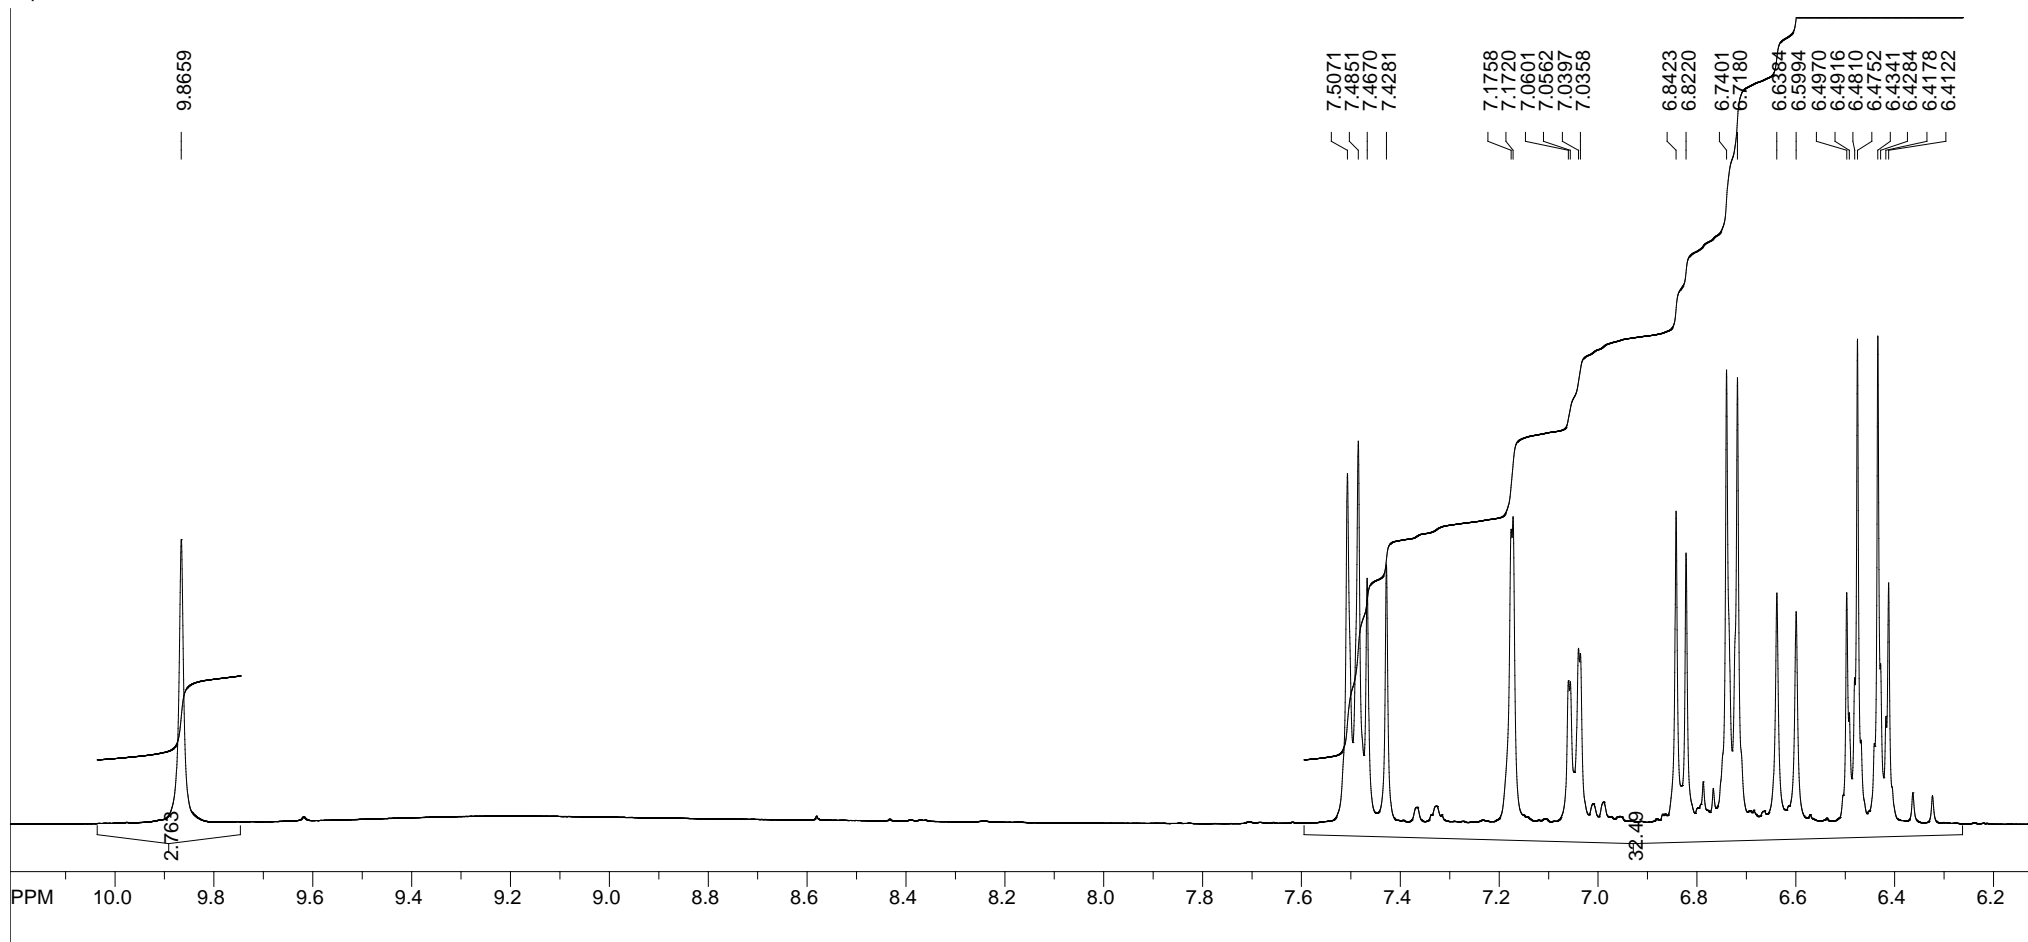

file: D:\MSA\New folder\Omar Adel\_H\_FA2\10\vid exp: &lt;zg30&gt;

transmitter freq.: 400.192471 MHz

time domain size: 65536 points

width: 8012.82 Hz = 20.022417 ppm = 0.122266 Hz/pt

number of scans: 32

freq. of 0 ppm: 400.190000 MHz

processed size: 65536 complex points

LB: 0.300 GB: 0.0000

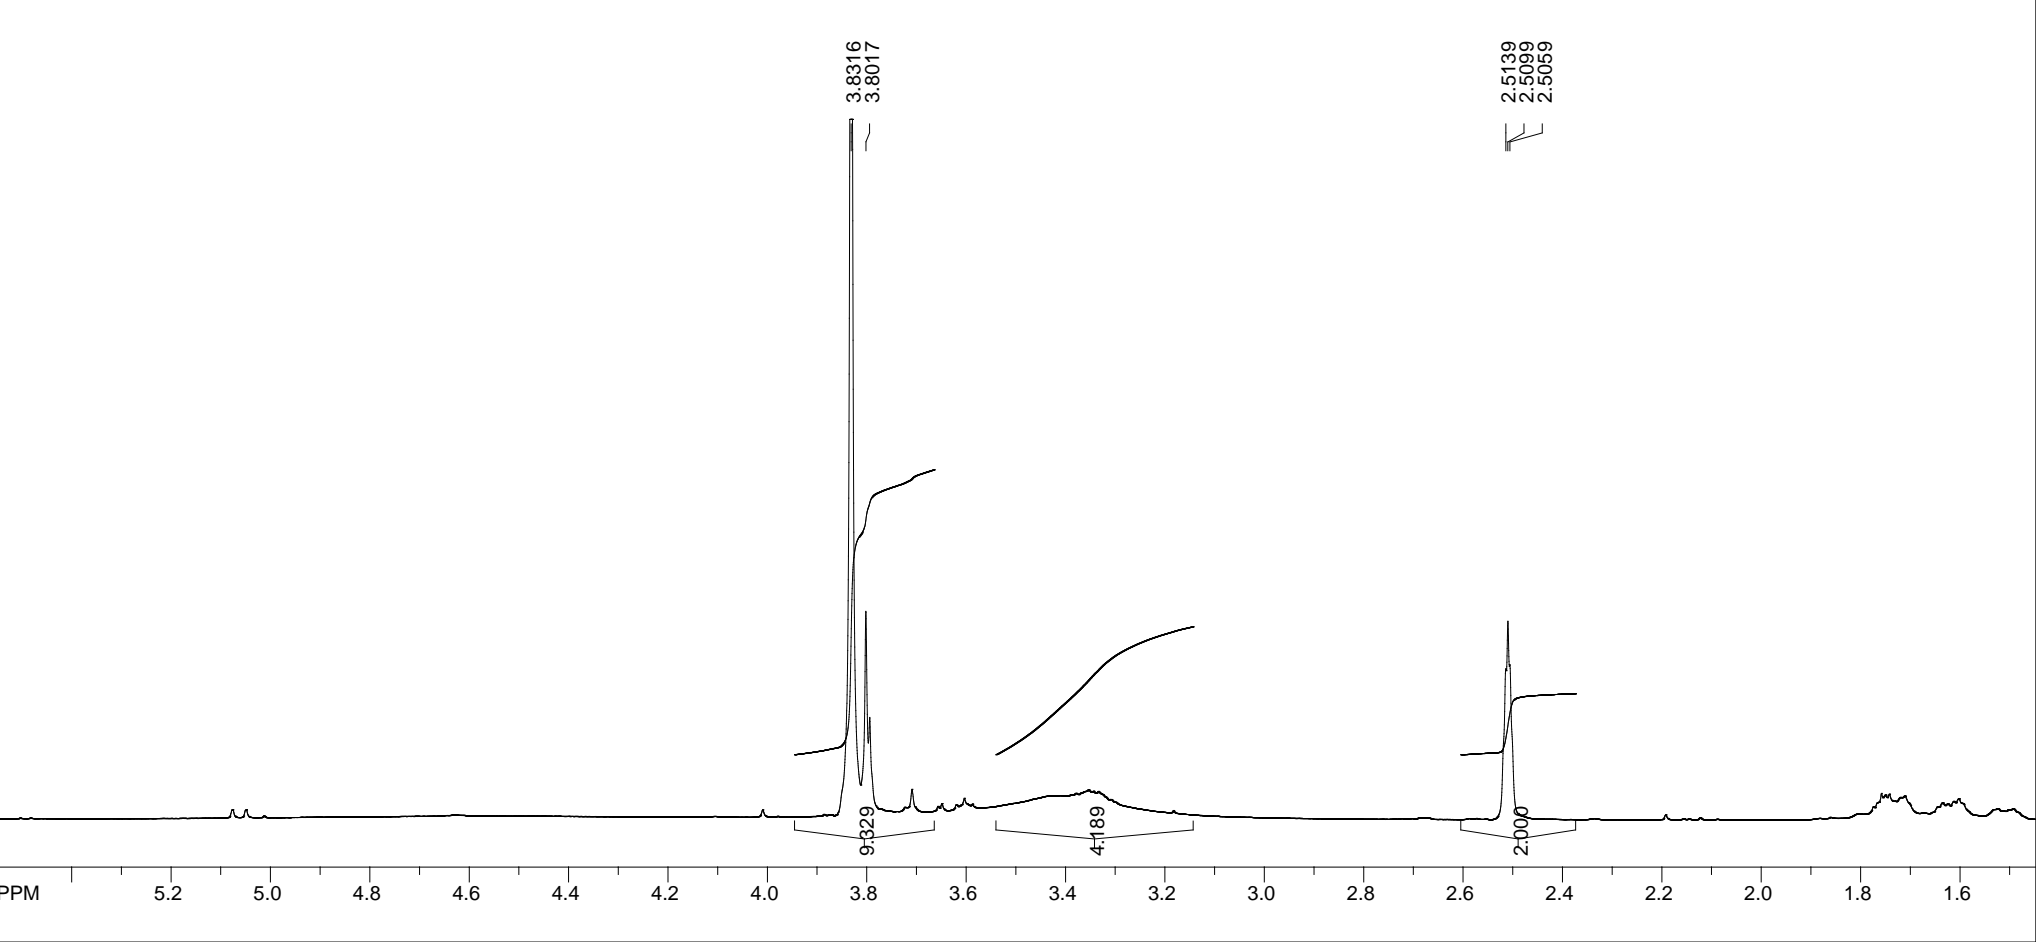

file: D:\MSA\New folder\Omar Adel\_H\_FA2\10\fid exp: <zg30>  
transmitter freq.: 400.192471 MHz  
time domain size: 65536 points  
width: 8012.82 Hz = 20.022417 ppm = 0.122266 Hz/pt  
number of scans: 32

freq. of 0 ppm: 400.190000 MHz  
processed size: 65536 complex points  
LB: 0.300 GB: 0.0000
