# Supplementary material for: Development of Semisynthetic Apoptosis-Inducing Agents Based on Natural Phenolic Acids Scaffold: Design, Synthesis and In-Vitro Biological Evaluation
Source: MDPI journal article supplement (doi:10.3390/molecules27196724), 2022-10-09
Supplement: s1 [file s1]

**Table: HGNC ID of the used genes**

| <b>Gene</b> | <b>HGNC ID</b> |
|-------------|----------------|
| P53         | <b>11998</b>   |
| CASP-3      | <b>1504</b>    |
| Bax         | <b>959</b>     |
| MMP-2       | <b>7166</b>    |
| MMP-9       | <b>7176</b>    |
